1 **Integrated cycles for urban biomass as a strategy to promote a CO<sub>2</sub>-neutral society – a**  
2 **feasibility study**

3 Nicole Meinus<sup>a</sup>, Susanne Kramer<sup>b</sup>, Oliver Körner<sup>b</sup>, Jürgen Wiese<sup>c</sup>, Ingolf Seick<sup>c</sup>, Anita Beblek<sup>d</sup>, Regine  
4 Berges<sup>d</sup>, Bernhard Illenberger<sup>e</sup>, Marco Illenberger<sup>e</sup>, Jennifer Uebbing<sup>f</sup>, Maximilian Wolf<sup>a</sup>, Gunter Saake<sup>g</sup>,  
5 Dirk Benndorf<sup>a, i</sup>, Udo Reichl<sup>g, a</sup>, Robert Heyer<sup>a, h</sup>

- 6
- 7 a. Otto-von-Guericke-University, Bioprocess Engineering, Universitaetsplatz 2, 39106  
8 Magdeburg, Germany
- 9 b. Leibniz Institute of Vegetable and Ornamental Crops (IGZ), Theodor-Echtermeyer-Weg 1  
10 14979 Grossbeeren, Germany
- 11 c. Hochschule Magdeburg-Stendal, Urban water management/wastewater,  
12 Breitscheidstrasse 2, 39114 Magdeburg, Germany
- 13 d. agrathaer GmbH, Eberswalder Str. 84, 15374 Muencheberg, Germany
- 14 e. Jassen GmbH, Egertenweg 10, 79585 Steinen, Germany
- 15 f. Max Planck Institute for Dynamics of Complex Technical Systems, Process Systems  
16 Engineering, Sandtorstrasse 1, 39106 Magdeburg, Germany
- 17 g. Max Planck Institute for Dynamics of Complex Technical Systems, Bioprocess Engineering,  
18 Sandtorstraße 1, 39106 Magdeburg, Germany
- 19 h. Otto-von-Guericke-University, Technical and Business Information Systems,  
20 Universitaetsplatz 2, 39194 Magdeburg, Germany
- 21 i. Anhalt University of Applied Sciences, Microbiology, Bernburger Strasse 55, 06354 Koethen,  
22 Germany

23

## 24 **Abbreviations**

|    |                     |                                              |
|----|---------------------|----------------------------------------------|
| 25 | AD                  | Anaerobic digestion                          |
| 26 | ADM1                | Anaerobic digestion model number one         |
| 27 | ADM1da              | Anaerobic digestion model number one da      |
| 28 | ADP                 | Anaerobic digestion plant                    |
| 29 | BioAbfV             | Bioabfallverordnung                          |
| 30 | CCPP                | Combined cycle power plants                  |
| 31 | CHP                 | Combined heat and power                      |
| 32 | CH <sub>4</sub>     | Methane                                      |
| 33 | CO <sub>2</sub>     | Carbon dioxide                               |
| 34 | CO <sub>2</sub> -eq | Carbon dioxide equivalent                    |
| 35 | CSTR                | Continuous stirred-tank reactor              |
| 36 | DLI                 | Daily light integral                         |
| 37 | DüngV               | Düngemittelverordnung                        |
| 38 | EC                  | Electrical conductivity                      |
| 39 | ICU                 | Integrated Cycles for Urban Biomass          |
| 40 | K                   | Potassium                                    |
| 41 | LAT                 | Latitude                                     |
| 42 | LCA                 | Life cycle assessment                        |
| 43 | LCCA                | Life cycle cost analysis                     |
| 44 | LON                 | Longitude                                    |
| 45 | MT                  | Microturbines                                |
| 46 | N                   | NitrogenNH <sub>4</sub>                      |
| 47 | NH <sub>3</sub>     | Ammonia                                      |
| 48 | NO <sub>3</sub>     | Nitrate                                      |
| 49 | NO <sub>3</sub> -N  | Nitrate nitrogen                             |
| 50 | NO <sub>2</sub>     | Nitrite                                      |
| 51 | NPK fertilizer      | Nitrogen, phosphate and potassium fertilizer |
| 52 | NPV                 | Net present value                            |
| 53 | N <sub>tot</sub>    | Total nitrogen                               |
| 54 | P                   | Phosphorus                                   |
| 55 | PFR                 | Plug flow reactor                            |

56 **Abstract**

57 Progressive global warming is one of the biggest challenges civilization is facing today. The  
58 establishment of a carbon dioxide (CO<sub>2</sub>)-neutral society based on sustainable value creation  
59 cycles is required to stop this development. The Integrated Cycles for Urban Biomass (ICU)  
60 concept is a new concept towards a CO<sub>2</sub>-neutral society. The integration of closed biomass cycles  
61 into residential buildings enable efficient resource utilization and avoid transport of biowaste. In  
62 this scenario, biowaste is degraded on-site into biogas that is converted into heat and electricity.  
63 The liquid fermentation residues are upgraded by nitrification processes (e.g., by a soiling®-  
64 process, EP3684909A1) to refined fertilizer, which can be used subsequently in house-internal  
65 gardens to produce fresh food for residents.

66  
67 Whereas this scenario sounds promising, comprehensive evaluations of produced amounts of  
68 biogas and food, saved CO<sub>2</sub> and costs as well as social-cultural aspects are lacking. To assess these  
69 points, a feasibility study was performed, which estimated the material and energy flows based  
70 on simulations of the biogas process and food production.

71  
72 The calculations show that a residential complex with 100 persons can generate 21 % of the  
73 annual power (electrical and heat) consumption from the accumulated biowaste. The nitrogen  
74 (N) in the liquid fermentation residues enables the production of up to 6.3 t of fresh mass of  
75 lettuce per year in a 70 m<sup>2</sup> professional hydroponic production area. The amount of produced  
76 lettuce corresponds to the amount of calories required to feed four persons for one year.

77 Additionally, due to the reduction of biowaste transport and the in-house food and fertilizer  
78 production, 6 468 kg CO<sub>2</sub>-equivalent (CO<sub>2</sub>-eq) per year are saved compared to a conventional  
79 building. While the ICU concept is technically feasible, its costs are still 1.5 times higher than the  
80 revenues. However, the model predictions show that the ICU concept becomes economically  
81 feasible in case food prices further increase and ICU is implemented at larger scale, e.g.; at the  
82 district level. Finally, this study demonstrates that the ICU implementation can be a worthwhile  
83 contribution towards a sustainable CO<sub>2</sub>-neutral society and enable to decrease the demand for  
84 agricultural land.

85  
86

87 **Keywords**

- 88 ● Integrated Cycles for Urban Biomass
- 89 ● Biogas
- 90 ● Carbon footprint
- 91 ● Sustainability
- 92 ● Renewable energy
- 93 ● Plant cultivation
- 94 ● Feasibility study
- 95 ● Simulations
- 96 ● CO<sub>2</sub>-neutral society

## 97 **1. Introduction**

98 One of the most demanding challenges for the future is progressive global warming caused by  
99 excessive carbon dioxide (CO<sub>2</sub>) emissions and other greenhouse gases. To stop global warming,  
100 our society must reduce the CO<sub>2</sub> emission and make our entire lifestyle CO<sub>2</sub>-neutral. While many  
101 concepts for sustainable electrical energy production already exist, CO<sub>2</sub>-neutral agriculture and  
102 biomass circulation concepts are lacking. And, since half of the world population now lives in  
103 cities, these concepts have to be also applicable to urban areas. For example, in some urban  
104 districts (e.g. the Jenfelder Au in Hamburg, Germany (Hertel et al., 2015)) black water is used on-  
105 site to produce heat and electricity by anaerobic digestion (AD). Furthermore, roof-top gardens  
106 enable the production of food in the cities (Barreca, 2016). Fuldauer *et al.* (Fuldauer, 2018)  
107 demonstrated that it is even feasible to connect a small-scale anaerobic digestion plant (ADP)  
108 with a hydroponic or algae cultivation system to close the biomass cycle. The benefits of closed  
109 urban biomass cycles are an efficient utilization of the resources and the avoidance of transport  
110 (Jouhara, 2017).

111 This study investigates the potentials and limitations of a concept for urban biomass circulation  
112 regarding energy and food production, carbon dioxide equivalent (CO<sub>2</sub>-eq) savings, costs, and  
113 social-cultural aspects in Germany.

114 The concept, called Integrated Cycles for Urban Biomass (ICU), demands an in-house ADP to  
115 degrade biowaste from residential buildings to biogas and digestate. The biogas generated is  
116 converted on-site to heat and electricity through a combined heat and power plant (CHP). The  
117 remaining fermenter liquid is upgraded by a soiling<sup>®</sup>-process (EP3684909A1) and a nitrification  
118 process to refined fertilizer. Finally, the liquid fertilizer is used to produce fruits, vegetables, and  
119 ornamental plants using either in-house integrated hydroponic systems, soil-based agriculture or  
120 roof-top gardens. Finally, the residents can consume the food while the accruing plant residues  
121 are fed into the ADP to close the biomass cycle again (Fig. 1). Whereas soil-based agriculture is  
122 more robust, the use of hydroponic systems for the production of vegetables enables faster  
123 growth, higher product quality and needs less space (Sapkota, 2019).

124 A key challenge to close the biomass cycle between anaerobic digestion (AD) and agriculture is  
125 transforming the digestate into fertilizer. Digestates contain high amounts of ammonium (NH<sub>4</sub>).  
126 But, while NH<sub>4</sub> can be used as a nitrogen (N) source by plants, high NH<sub>4</sub> contents potentially  
127 increase N-losses by emission and can inhibit plant growth, especially in hydroponics. Therefore,  
128 NH<sub>4</sub> has to be oxidized via nitrite (NO<sub>2</sub>) to nitrate (NO<sub>3</sub>) (e.g. by the soiling<sup>®</sup>-process). In particular,  
129 for hydroponic-based crop production, fertilizer quality is of high importance as, among others,  
130 its buffer capacity is very low (compared to soil). For hydroponics, under optimal conditions,

131 synthetic or inorganic-based fertilizers are commonly applied. However, organic-based

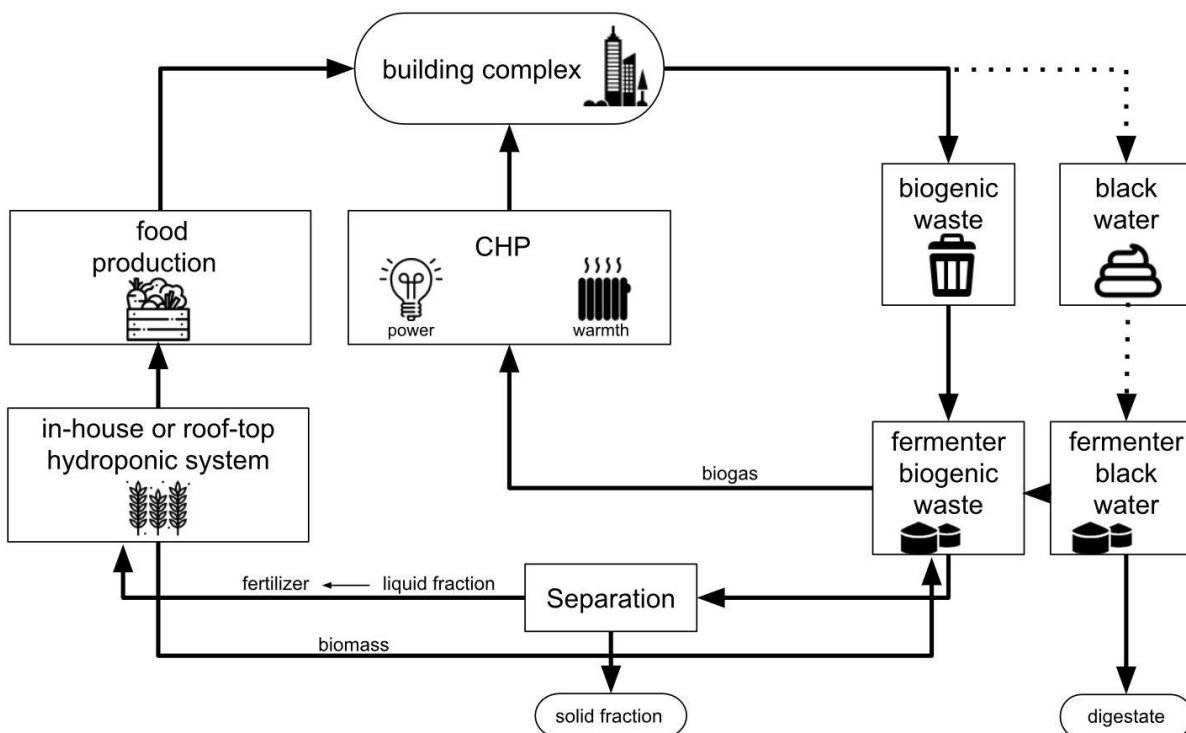

132

133 **Fig. 1: Process chart of ICU concept.** □: Integrated Cycles for Urban Biomass (IUC) processes.  
 134 ○: Input of biomass through the building complex into the process; outputs like solid fraction and  
 135 digestate. “.....”: additional blackwater for biogas production.

136

137 nutrient solutions such as fermenter digestates are also suitable, while the nitrification step needs  
 138 to be implemented for deriving plant-available N-forms (Krishnasamy et al. 2012, Shinohara et al.  
 139 2011, Stoknes et al. 2016). With the adjustment of the correct dilution ratio and nutrient  
 140 concentrations of the organic fertilizers, similar or even higher yields compared to a commercial  
 141 nutrient solution are possible (Liedl et al. 2004, Wang et al. 2019). Finally, based on a Life Cycle  
 142 Assesment (LCA), the reduction of CO<sub>2</sub>-eq can be calculated (Lombardi et al., 2003).

143

## 144 2. Methods

145 To assess the ICU concept regarding energy and food production, the conversion of biowaste to  
 146 heat and electricity using AD (section:2.1.) and agriculture (section: 2.2 and 2.3) were simulated.  
 147 CO<sub>2</sub>-eq reductions as an indicator for the global warming potential of parts of the ICU process  
 148 were evaluated by LCA (section: 2.4). In addition, the costs for the implementation of the ICU  
 149 concept in real buildings were estimated (section: 2.5). Finally, social-cultural aspects of the  
 150 implementation were reviewed for Germany (section:2.6).

151

152

153

## 154 **2.1 Modelling in-house biowaste degradation for energy production**

155 Biogas production was used as a key process to model biowaste conversion to heat and electricity.  
156 The entire process was simulated using pre-implemented building blocks from the software  
157 SIMBA#Biogas (<https://www.ifak.eu/de/produkte/simba-biogas>, ifak, 2020) (Fig. 2) assuming a  
158 building with 100 residents.

159 The “Biowaste block” (input) assumes homogenization at 70 °C to ensure the necessary  
160 sanitization conditions. Therefore, the biomass will be pretreated in a homogenization tank for 2-  
161 3 days before fermentation (Luste et al., 2010). On average, residents are supposed to produce  
162 33.6 kg of biogenic waste and 720 l of blackwater per day. Since the amount of biowaste  
163 fluctuates over the year, an increase of 22 % for four months and a feeding of 30.7 kg for five days  
164 a week was applied to monitor the dynamic behavior (Hanc, 2011, supplementary file 1). The  
165 “Converter block” takes into account the biomass composition based on literature values  
166 (supplementary file 1, Malakahmad et al., 2008, Hanc et al. 2011). The “Biowaste Fermenter  
167 block” represents the conversion of kitchen and hydroponic biowaste into biogas and digestate.  
168 The simulations use the Anaerobic Digestion Model Number 1 da (ADM1da), which is an extension  
169 of the Anaerobic Digestion Model Number 1 (ADM1) (Karlsson et al., 2017). The ADM1da  
170 comprises 32 differential and algebraic equations. They represent all relevant steps of the  
171 biomass degradation and physicochemical process parameters. Operation of the ADP at 55 °C was  
172 assumed. The “Gas analysis block” defines the biogas composition. The “CHP block” is used to  
173 determine the methane (CH<sub>4</sub>) yield into electrical energy and heat. Here, an electrical efficiency  
174 of 38 % and a thermal efficiency of 45 % was used (Liebetrau et al. 2020, Scheftelowitz et al.  
175 2013). The electrical efficiency increases with the purity of the AD product gas (Liebetrau et al.  
176 2019). The “Separation block” is used to split the digestate into a thin (liquid) and a thick (solid)  
177 fraction. The liquid effluent is further processed and nitrified by the soiling<sup>®</sup>-process into refined  
178 digestate. Soiling<sup>®</sup>-nutrient recycling fertilizer is composed of mineral N plus macro- and  
179 micronutrients. Note: only the N amount can be taken into account with Simba; for further  
180 calculations the macro- and micronutrients were neglected.

181 For the “Blackwater block” (input) a second fermenter is considered as there is currently no  
182 approval for a fertilizer containing anthropogenic raw material in Germany according to the so-  
183 called Düngemittelverordnung (DümV, 2012). Therefore, blackwater fermentation is only  
184 considered for energy production but not for fertilizer production. Furthermore, the “Blackwater  
185 Fermenter block” is modeled by three different reactor block configurations to identify the most  
186 efficient one. The first scenario considers biogas production inside a continuously stirred-tank  
187 reactor (CSTR). The second scenario takes into account five CSTR blocks connected in series to  
188 simulate a plug flow bioreactor (PFR). The third scenario describes a two-stage reactor (2sR).  
189 Here, a small CSTR is used for hydrolysis and fermentation of biowaste, whereas acidogenesis and  
190 methanogenesis occur in a bigger second CSTR. The specific parameter settings for all scenarios  
191 are in the supplementary file 2a, 2b, 2c, 2d.

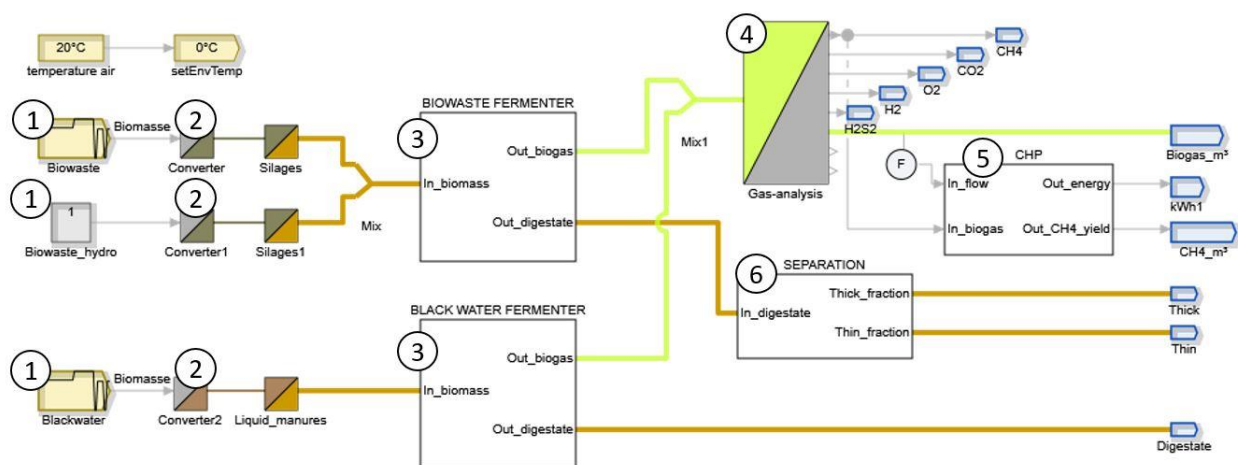

192  
 193 **Fig 2. Simba model for in-house degradation of biowaste to heat and electricity.** 1. Biomass  
 194 input of biogenic waste and blackwater with 70 °C pre-treatment. 2. The Converter block determines the  
 195 biomass composition. 3. The Fermenter block determines the biogas and digestate output. 4. The Gas  
 196 analysis determines the biogas composition. 5. The CHP block converts biogas into energy with a calorific  
 197 value of 10.5 kJ/kg 6. The Separation block determines thick (solid) and thin (liquid) fractions.  
 198

199 The ADP considered in this work was assumed to produce biogas with a calorific value of 10.5  
 200 kJ/kg Thus, neither combined cycle power plants (CCPP) nor CHP can be applied on-site because  
 201 of their lower efficiency. In practice, many operators of small-scale biogas plants favour a satellite  
 202 CHP over on-site power production. A satellite CHP is supplied with biogas from multiple small-  
 203 scale biogas plants via a local micro gas grid (Scheftelowitz et al. 2013). The assumption is that a  
 204 large number of small-scale biogas plants are nearby; an option that could also be applied here.  
 205 Suitable for the on-site power production of small-scale biogas plants are fuel cells, microturbines  
 206 (MT), and engines (igniting beam engine, gas engine). Fuel cells can reach high electrical  
 207 efficiencies and run quietly. However, they are comparatively large, expensive and their operation  
 208 requires a high gas purity, which would make additional biogas upgrading necessary. Therefore,  
 209 the use of a fuel cell was not considered in this study. MT, on the other hand, can operate with a  
 210 wide range of CH<sub>4</sub> concentrations (30-100 %) (Scheftelowitz et al. 2013). MTs reach an electrical  
 211 efficiency of 25-33 % with a thermal efficiency of ~49 % (Lugmayr, 2010), and operate silently and  
 212 environmentally compatible (Hasemann, 2015). MTs are commonly applied on a 30-550 kW scale  
 213 (Scheftelowitz et al. 2013, Lingstädt et al., 2018). Commercial 1 kW scale turbines are under  
 214 development (ENBW, 2021). However, at the current state, small-scale implementations are  
 215 inefficient (11 % electrical efficiency) at costs of around 6 000 € per turbine (Haseman, 2018,  
 216 Agelidou et al. 2019). Alternatively, engines (igniting beam engine, gas engine) can reach a higher  
 217 electrical efficiency than MTs of 30-40 % and a thermal efficiency of ~47 %. Compared to MTs,  
 218 engines are louder, produce noxious side products and require more maintenance. In particular  
 219 igniting beam engines, which require the addition of pilot oil for combustion, produce noxious



220 side products and soot, which inhibits the efficient use of excess heat (Lugmayr, 2010). The  
221 preferable alternative are gas engines, which operate without pilot oil but require CH<sub>4</sub>  
222 concentrations above 45 % (Lugmayr, 2010).

223 In summary, gas engines were considered the most attractive option for on-site production of  
224 electrical energy from AD product gas in this study. However, if other small-scale biogas plants  
225 were available, a satellite CHP could be the more efficient alternative.

226

## 227 **2.2 Crop production systems**

228 The amount of total N ( $N_{\text{tot}}$ ) ( $N_{\text{tot}} = N_{\text{org}} + \text{NH}_4\text{-N}$ ) is the main input to calculate the liquid effluent.  
229 An optimal, highly efficient system with biologic activity efficiency of 1.0 was assumed, i.e., 100  
230 % of  $N_{\text{tot}}$  was transformed into plant-available nitrate-nitrogen (NO<sub>3</sub>-N) by the soiling<sup>®</sup>-process.  
231 For cultivation planning (system sizing), the ratio of fresh biomass production to available N was  
232 considered. As model crop lettuce (*Lactuca sativa ssp.*) was used. A fresh matter N content of  
233 0.18 % was assumed (Feller et al. 2019) with a fixed dry matter fraction of 0.048 %.

234 Four possible methods were considered for lettuce cultivation: Scenario 1 and 2 are open-air plant  
235 cultivation systems with raised beds or vertical hydroponics, respectively. The residents drive  
236 these scenarios on the roof-top with a cultivation period from April to October (vegetation period  
237 of Berlin). Both scenarios are complex as they involve the participation of community members  
238 (that are outside of the scope of the present simulations). Scenario 3 and 4 are protected  
239 cultivations with hydroponic greenhouses or plant factories, respectively. Both have to be  
240 operated year-round by trained staff and can be located on the roof-top or in the basement of  
241 buildings. Here a pure bio-technical assessment using deterministic explanatory simulation  
242 models was applied.

243 A numerical simulator for controlled environments and greenhouses was used that is a further  
244 development of earlier published greenhouse simulators (Körner and Hansen, 2012; Körner et al.,  
245 2008). The simulator was programmed using MATLAB (MathWorks Inc., USA). It was connected  
246 to a replica of commercially available climate controllers, including a setpoint generator that  
247 calculated climate setpoints for heating, ventilation, light and CO<sub>2</sub> concentration. The simulator  
248 was fitted to a standard Venlo-type greenhouse structure or a vertical farming hydroponics-  
249 controlled environment (scenario 3 and 4). The simulator's crop-basis is a photosynthesis-driven  
250 growth model with microclimate predictions for water and nutrient uptake according to the  
251 Penman-Monteith equation (Körner et al., 2007). Nutrient uptake was calculated assuming that  
252 the diluted nutrients in the irrigation system are optimally taken up by the crop. As such, a perfect  
253 pH, electrical conductivity (EC), and a root environment with optimal nutrient solution  
254 composition with an optimal availability of all nutrients were assumed. In accordance with  
255 Goddek and Körner (2019), all element-specific chemical, biological or physical resistances were  
256 set to zero.

257 For technical layout, supplementary lighting was applied with LED lamps installed either under  
258 the roof above the crop with an installed capacity of 80 W m<sup>-2</sup> power and an output of 192 μmol  
259 m<sup>-2</sup> s<sup>-1</sup> or at an installed capacity of 110 W m<sup>-2</sup> power and an output of 264 μmol m<sup>-2</sup> s<sup>-1</sup> in scenario  
260 3 or 4, respectively. The light was controlled dynamically with setpoints generated using a daily  
261 light integral (DLI) of either 12 mol m<sup>-2</sup> d<sup>-1</sup> or 20 mol m<sup>-2</sup> d<sup>-1</sup> for greenhouse or vertical farming,

262 respectively (Körner et al., 2006). In both scenarios, CO<sub>2</sub> in the air was set to 700 μmol mol<sup>-1</sup> and  
263 supplied according to the demand (max. at 15 g m<sup>2</sup> h<sup>-1</sup>) during lightening when greenhouse vents  
264 were closed and at all times in the vertical farming scenario. In the greenhouse scenarios, heat  
265 exchange for cooling was calculated with passive roof ventilation while active cooling and  
266 dehumidification were used in the vertical farming-controlled environment scenarios (active  
267 cooler based on ANSI/AHRI standards 1200 (Anonymous, 2013). Dehumidification was  
268 implemented with a commercially available dehumidification unit of the type ventilated latent  
269 heat energy converter. Further model parameters are summarized in the supplementary file 3.  
270 The simulator calculated macro- and microclimate in a time-step of 5 min, integrated hourly using  
271 controlled actuators (e.g., heating, ventilation, cooling, CO<sub>2</sub>, light) that were re-adjusted as  
272 described by Körner and Van Straten (2008). The simulations' output included hourly biological  
273 and physical variables related to lettuce production, such as microclimate conditions,  
274 photosynthesis, yield, and resource consumption (electrical power, heating energy, water, CO<sub>2</sub>).  
275 Input to the simulation program included, among others, physical location (latitude (LAT),  
276 longitude (LON)), humidity set point (%), set points for heating and ventilation (°C), crop planting  
277 density (plants m<sup>-2</sup>) and temperature-sum related harvest time. Input climate data were hourly  
278 data sets for Berlin (Germany, LAT 52.5N, LON 13.4) from 2009 to 2018 (Meteoblue;  
279 [www.meteoblue.com](http://www.meteoblue.com)). Calculations were performed for all scenarios for single years of each of  
280 the 10-year horizons.

281 Simulations were performed targeting nutrient and water uptake, yield, and energy demand for  
282 heat and lighting for either a greenhouse with a size of 70 m<sup>2</sup>, or for a vertical farm with a four-  
283 layer system (17.5 m<sup>2</sup> each, in a room of 30 m<sup>2</sup> area and 2.50 m height). As commercially viable  
284 climate control in small greenhouses is challenging to maintain, a 500 m<sup>2</sup> greenhouse as minimum  
285 commercial size was modeled in addition. All simulations were done for year-round production  
286 of hydroponically grown lettuce with a fixed planting density of 36 plants m<sup>-2</sup> as in commercial  
287 practice (e.g., Brechner et al., 2013).

288

### 289 **2.3. Estimation of the CO<sub>2</sub> saving potential using life cycle assessment with openLCA**

290 The ICU concept offers the opportunity to save CO<sub>2</sub> due to reduced transport of biowaste and  
291 food (Finkbeiner et al., 2006). To quantify the amount of saved CO<sub>2</sub>, a Life Cycle Assessment (LCA)  
292 with the open-source software openLCA (version 1.10.3) was conducted. This software considers  
293 the total energy consumption by all components at various levels. The used database was  
294 ecoinvent35\_Cut (Wernet, 2016). The system environment was divided into five phases:  
295 extraction of raw materials and energy sources, manufacture, use, transport and disposal (Fig.  
296 3.A) (McDonough, 2010). The boundaries for the ecological assessment are shown in Fig. 3.A (grey  
297 dots). An average distance of 30 km for the transport of biowaste to the ADP in the conventional  
298 scenario was assumed. In the ICU concept, transport was neglected (Fig. 3.B). All flows and  
299 process data are found in the supplementary file 4. The system contains specific elements  
300 providing the functional unit of 1 kg biomass for the complete life cycle. The input flow is 11 t  
301 with bio-degradable garden and park waste, food and kitchen waste from households,  
302 restaurants, caterers and retail stores, comparable waste from food processing plants as well as  
303 forestry or agricultural residues, and manure. It does not contain sewage sludge or other  
304 biodegradable waste such as natural textiles, paper or processed wood.

305

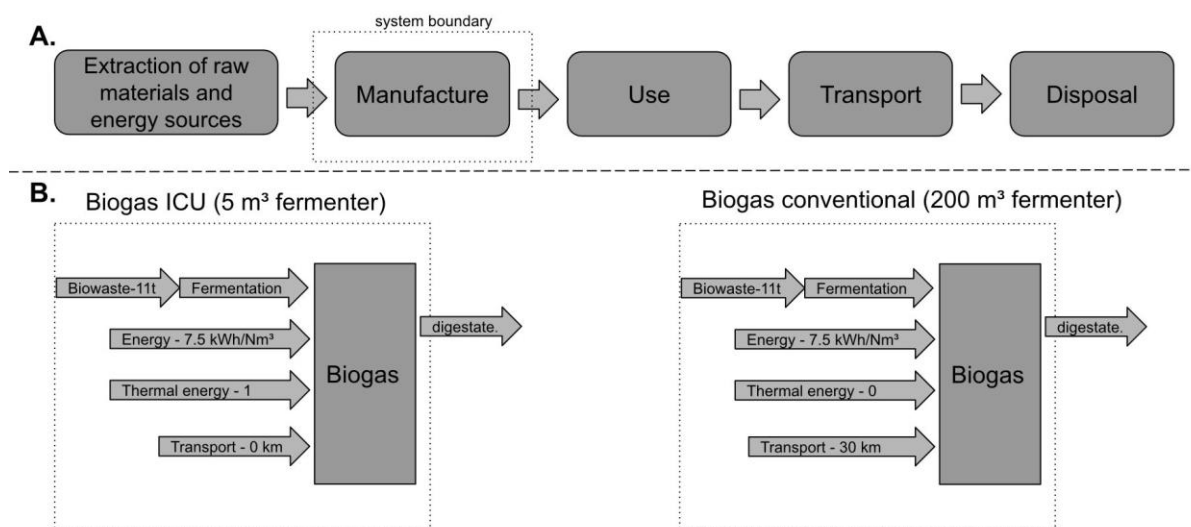

306

307 **Fig. 3: System boundaries of the Life Cycle Assessment study.** A: System environments of the  
308 product life-cycles based on DIN 15804 in four steps and system boundary (functional unit 1 m<sup>3</sup>  
309 biogas). B: System boundary for the ICU concept in comparison to a building with transport of  
310 biowaste to a conventional biogas plant. (Energy: [https://biogas.fnr.de/daten-und-](https://biogas.fnr.de/daten-und-fakten/faustzahlen)  
311 [fakten/faustzahlen](https://biogas.fnr.de/daten-und-fakten/faustzahlen))

## 312 2.4 Cost calculation

313 The costs of implementing the ICU concept were estimated by a life cycle cost analysis (LCCA,  
314 equation 1) for the example of a building with 100 residents. Therefore, the costs for acquiring  
315 and operating the fermenters, the soiling, the hydroponic systems, the technical staff and the  
316 building's space were considered taking into account the net present value (NPV).

317 Investment costs (C) were depreciated for a period of 20 years. Replacement costs were assumed  
318 with 10 % of the investment costs after 20 years and maintenance costs (A+M) with annually 5 %  
319 of the investment costs. Energy costs (E) were omitted since the system produces the required  
320 energy on its own. Also, the resale value (R) of the installations was assumed as "0" € as it was  
321 expected that the building's value remains at least stable. Additionally, ADP operation and plant  
322 cultivation require an experienced worker requiring at least 25 € per hour.

323 The production of in-house biogas generates energy in form of electricity and heat. This energy is  
324 reused inside the ICU building. If the generated energy were sold, the price for 1 kWh heat and 1  
325 kWh electricity would be 0.024 € (Andor et al., 2018) and 0.13 € (§43 EEG 2017), respectively. A  
326 summary of results obtained is found in table 3 (section 3.4).

327 Against these costs, the value of the produced energy and food was taken into account. The  
328 benefit of the reduction in the disposal of biowaste and wastewater was neglected to avoid

329 further complication of the calculation. Furthermore, the installation of vacuum toilets and  
330 separate black and grey water tubes is also cost-intensive. However, the cost of the installations  
331 compensates with the benefit of a reduced wastewater volume.

$$332 \quad NPV = C + R - S + A + M + E \quad (1)$$

333

334 *C = investment costs*

335 *R = replacement costs*

336 *S = resale value at the end of study period*

337 *A = sum of annually recurring operating, maintenance and repair costs*

338 *M = non-annually recurring operating, maintenance and repair cost*

339 *E = energy costs*

340

## 341 **2.5 Overview of important social-cultural aspects required for the implementation**

342 To assess social-cultural aspects for the implementation of the ICU concept in Germany, a  
343 literature survey was performed addressing the following questions:

- 344 • How great is the interest of the residents in urban agriculture and sustainable lifestyles?
- 345 • How great is the willingness of real estate owners to implement an ICU concept?
- 346 • How important is it for the government to achieve a carbon-neutral society?
- 347 • Which legal paragraphs have to be considered for implementing an ICU concept?
- 348 • Which additional social-cultural aspects might be relevant for implementing an ICU  
349 concept?

350 While for most of these questions results and data from literature already exist, the question on  
351 the real estate owners' willingness to implement an ICU concept has not been addressed, so far.  
352 Therefore, an online survey to collect this data was performed. To obtain a comprehensive picture  
353 of the attitude towards this new concept, 235 real estate owners, about 15 from every Federal  
354 State, were selected. All owners received a short online questionnaire containing ten questions  
355 (supplementary file 5) to rate to which extend different aspects of the ICU concept and its  
356 implementation are important to them. In the end, only 14 answers were received.

357

## 358 **3. Results and Discussion**

359 This feasibility study evaluates the amount of energy (section: 3.1) and food (section: 3.3), which  
360 could be produced by implementing an ICU concept for a building with 100 residents. Before the  
361 final simulation, the ADPs' fermenter size and configuration were evaluated and the best scenario  
362 for house-internal food production was selected. A precondition for plant growth was converting  
363  $\text{NH}_4$  in the digestate to  $\text{NO}_3$  (section: 3.2).

364 Based on the ICU-concept's best scenario, the costs were calculated (chapter: 3.4) and the  
365 potential  $\text{CO}_2$ -savings (section: 3.5). Finally, social-cultural aspects were reviewed, including the  
366 laws required for implementing the concepts (section: 3.6) and potential addons for the ICU-  
367 concept (section: 3.7).

368

369 **3.1.1 Utilization of biowaste by optimized anaerobic fermenters enable to cover 21 % of the**  
370 **annual energy demand of the building**

371 As the first step, the size and performance of CSTR, PFR, and 2sR ADP for processing of biowaste  
372 (Fig. 4) and black water (Fig. 5) were compared based on the energy content of the biogas. The  
373 volume ratio between the hydrolysis and the main fermenter of the 2sR was 1:50 as determined  
374 in the supplementary table 6. For the PFR the sum of all five fermenters connected in series was  
375 assumed for the simulation.

376 The first scenario was the calculation of biowaste input in one fermenter with an average amount  
377 of 33.6 kg biowaste per day (Fig. 4). Depending on the reactor size 1 kW energy may be produced.  
378 The second scenario calculates the additional black water fermentation in a second fermenter  
379 with an average of 720 L black water per day (Fig. 5). Black water may improve the daily energy  
380 yield to 3 kW energy, fitting to the values of studies with similar substrates (Wriege-Bechtold et  
381 al. 2015).

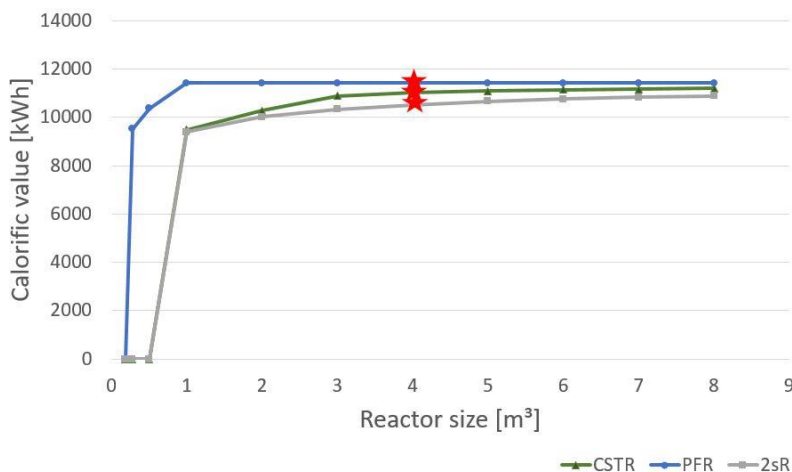

382  
383 **Fig. 4: Evaluation of reactor scenarios with biowaste fermenters.** Energy content of the biogas  
384 produced annually (without losses). Only biowaste input. For PFR reactor the sum of all 5  
385 fermenters and for 2sR is hydrolyse + main fermenter are considered. Star shows the chosen  
386 reactor size.

387

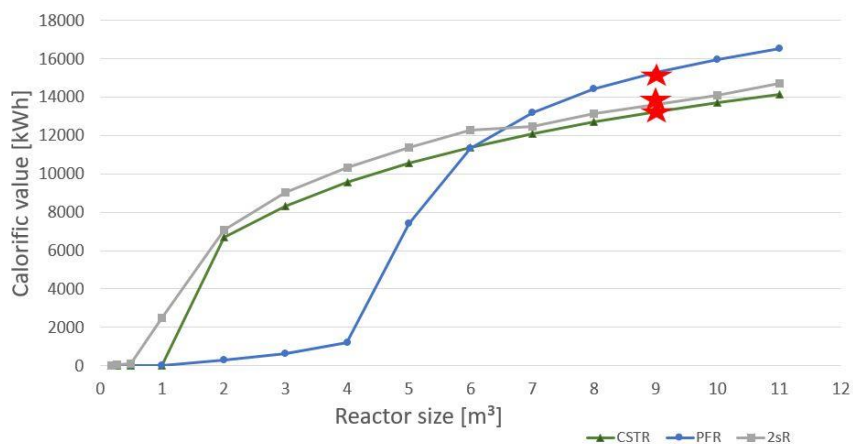

388  
389 **Fig. 5: Evaluation of reactor scenarios with additional blackwater fermenter.** Energy content of  
390 the biogas produced annually (without losses). Blackwater input. For PFR reactor the sum of all 5  
391 fermenters and for 2sR is hydrolyse + main fermenter are considered. Star shows the chosen  
392 reactor size.

393 For the first scenario the simulation of PFR produces about 5.5 % more energy than the two-step  
394 and 22 % more than the CSTR fermenter. These magnitudes between the fermenter types were  
395 also shown by Bensman et al. (Bensmann,2013). Additionally, a PFR is more robust against  
396 contaminants like plastic material in biowaste. The shape of the power to fermenter size curve is  
397 sigmoid, reflecting that too small fermenter sizes lead to acidification, whereas too large  
398 fermenter adds no further benefit (Fig. 4). As optimal biowaste fermenter sizes were chosen a 4  
399 m<sup>3</sup> CSTR-fermenter, five fermenters connected in series with each 1 m<sup>3</sup> for the PFR-fermenter  
400 and also 4 m<sup>3</sup> for the main fermenter of the 2sR (Fig. 4). The PFR-fermenter was selected as  
401 optimal because with 11.434 kWh calorific value annually it was able to produce the most energy.  
402 This amount of energy corresponds to 9.5 % of the annual energy demand of 100 persons (Fronde  
403 et al., 2015). Since the reactors with their control units require less than 20 m<sup>2</sup>, installation in the  
404 technical center of a building is technically feasible. Production of heat and electricity would  
405 require an additional CHP unit of about 10 m<sup>2</sup> size. Alternatively, the biogas can be used to cook  
406 and climatize the building. This scenario requires that the building have gas heating/heating  
407 pumps instead of an oil or electric system.

408 In comparison the second scenario with an additional black water produce 25,855 kWh energy.  
409 This scenario is ecological more efficient to the first one because it can cover 21 % of the yearly  
410 energy production (Fig. 5). As optimal reactor size for the CSTR a 9 m<sup>3</sup> fermenter, for PFR five  
411 fermenters connected in series with each 1.8 m<sup>3</sup>, and for 2sR 9 m<sup>3</sup> were chosen.

412 Because of the higher energy content, the additional fermentation of black water should be  
413 considered for the ICU-concept. For black water usage, the separation of grey and black water is



414 needed. This required a two-pipe system and separation or vacuum toilets (e.g. Jenfelder Au, Gao  
415 et al., 2006). The implementation is technically demanding but allows the reuse of greywater,  
416 which would further reduce water consumption..

### 417 3.1.2 Dynamic behavior of the anaerobic digester

418 For the first simulation a constant supply of biowaste and black water with the chance that  
419 fluctuations occur was assumed. To assess the dynamic behavior of the system, after initial  
420 conditions (i), a shift in the feeding rate from (ii.) constant 33.6 kg/d to (iii.) an increase of biomass  
421 of 18 % for four months (iii.) to (iv.) a feeding rate of 30.7 kg/d for only five days a week was  
422 considered. The simulation of all three fermenter types (2sR, CSTR and PFR) shows smooth  
423 transitions for the different changes in the feeding strategy indicating an overall stable process  
424 behavior. This suggests that the ICU concept could be easily integrated into buildings. However,  
425 systems for handling fluctuations in gas production such as gas storage tanks or gas torches  
426 should be considered in case of technical problems (data not shown). Furthermore, it is known  
427 that ICU systems are prone to long periods of biomass overloading (Bensmann et al. 2016) and  
428 require a relatively long period for the start-up.

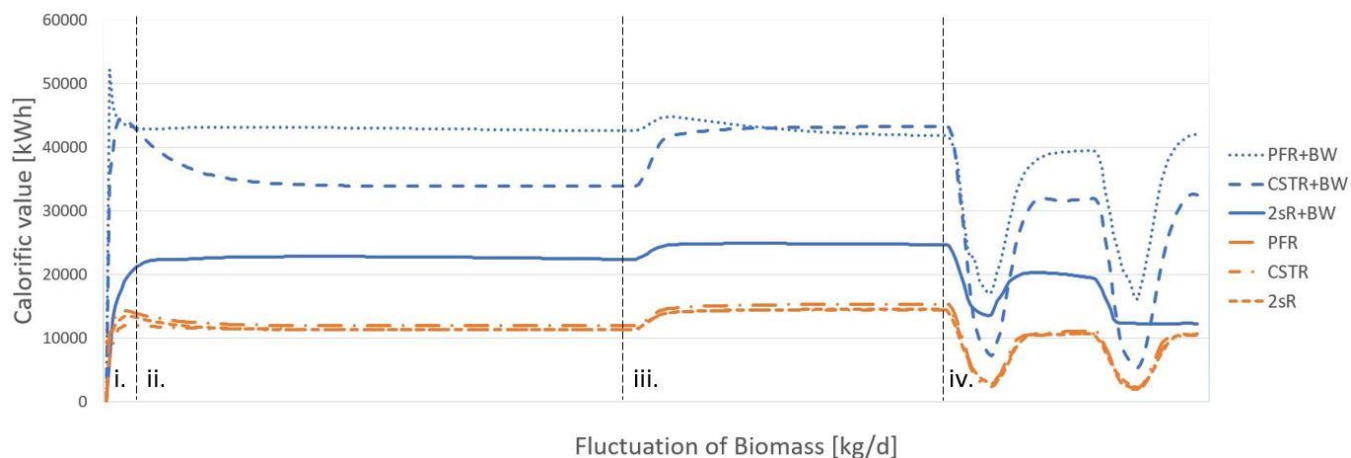

429  
430 **Fig. 6: Dynamic behavior of the ICU model.** Feed fluctuations: Energy production from biowaste  
431 (green) and additional black water (BW) (brown) for 2sR, CSTR and PFR fermenters. i: Initiation  
432 phase of the model. ii. Feeding rate of 33.6 kg/d iii. Feeding rate of 41.1 kg/d iv. Feeding rate of  
433 30.7 kg/d for five days a week.

### 434 3.1.3. The soiling®-process represents an efficient approach to convert digestate to fertilizer

436 Digestates contain high amounts of NH<sub>3</sub>-N but not NO<sub>3</sub>-N required for plant growth in soilless  
437 cultivations. NH<sub>3</sub> conversion to NO<sub>3</sub> can be achieved by composting, by the soil microbiome and  
438 by nitrification fermenters. One efficient nitrification fermenter is the Soiling®-module from  
439 Jassen Kunststoffzentrum GmbH (EP 3684909A1). Verification of Jassen GmbH shows that  
440 before the soiling®-treatment, the NH<sub>3</sub> amount was 200 mg/l. After 9 days of aeration with 25

441 m<sup>3</sup>/d oxygen, the NH<sub>3</sub> amount decreased to 15 mg/l. This means 92.5 % of the NH<sub>3</sub>-N is nitrified  
442 into NO<sub>3</sub>-N (calculation in supplementary file 9). This is superior to other nitrification systems, like  
443 the nitrification system of Wang et al., 2017, which has an efficiency of about 87.2 %. Therefore,  
444 the soiling<sup>®</sup>-system was used for all further calculations. In addition, the project partner Jassen  
445 Kunststoffzentrum GmbH could provide exact numbers for the conversion of the digestate taken  
446 from ADP to the fertilizer. Here, a digestate yield of 2.63 l fertilizer per day containing 0.00594  
447 kg/NO<sub>3</sub>-N per liter. In total, this requires 535.7 kJ energy for each kg N. For comparison: the  
448 production of fertilizer using artificial nitrogen fixation process (Haber-Bosch process) requires  
449 already 10.800 kJ per kg N for the production of NH<sub>4</sub>, which has still to be converted to nitrate. A  
450 precondition for the nitrification step is a separation of the liquid and solid components of the  
451 digestate. This separation could be achieved by a screw press that is easy to handle and has a low  
452 energy consumption (about 0.5 kJ). The remaining solid fraction could also be used be upgraded by  
453 composting but this was not further considered here. To estimate how much N can be produced  
454 as fertilizer from a hydroponic system, the N flow according to the Simba model was considered  
455 (Fig. 7).

456

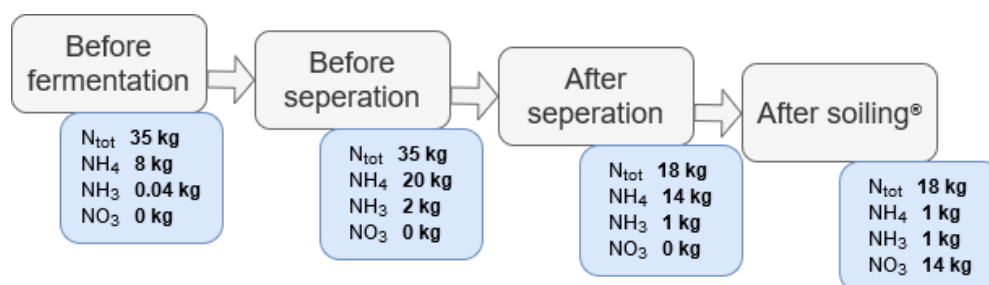

457

458 **Fig. 7: N flow according to the Simba model.** *N<sub>tot</sub>* = total nitrogen, *NH<sub>4</sub>* = ammonium, *NH<sub>3</sub>* =  
459 ammonia, *NO<sub>3</sub>* = nitrate. Quantities relate to one year.

460

### 461 3.2.1 Strategies to integrate plant growth into buildings

462 Our feasibility study considered four scenarios for house-internal gardens (plant production) and  
463 compared them regarding productivity, nutrient utilization, energy demand, required skills and  
464 social inclusion. For scenario 1 and 2, crop is produced in open roof-top gardens, while protected  
465 cultivation in greenhouses or plant factories, also called vertical farming (Carotti et al., 2021), is  
466 assumed for scenario 3 and 4. Thus, the scenarios increase from low level to high-level control  
467 from scenario 1 to scenario 4 (Fig. 8). Plant factories allow to cultivate crops in multiple layers  
468 with a high productivity and uniformity (Graamans et al., 2018). These systems are completely  
469 isolated from the exterior climate with the control of light, temperature, relative humidity and  
470 CO<sub>2</sub> concentration (Carotti et al., 2021). Especially by controlling the light quality, the yield and  
471 the nutritional value of lettuce can be increased (Cammarisano et al., 2020). However, with  
472 increased control from scenario 1 to scenario 4, energy consumption increases through the supply



473 of mechanical heat in greenhouses (Bailey and Seginer, 1989) and electric light in plant factories  
474 (Graamans et al., 2018; Harbick and Albright, 2016).

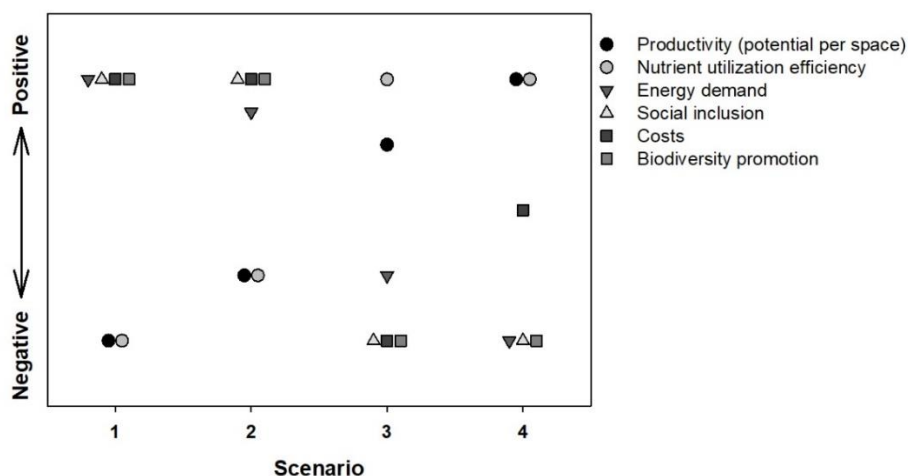

475 **Fig. 8. Relative assessment of the cultivation scenarios.** Scenario 1: roof-top raised-bed, community  
476 residents; Scenario 2: roof-top vertical hydroponic system, community residents; Scenario 3: roof-top  
477 greenhouse, professional management; Scenario 4: basement vertical farm, professional management.  
478  
479

480 In scenario 1, plants are cultivated in raised-beds on the roof-top and maintained by community  
481 residents. In this scenario, the residents have a high ecological “feelgood factor”. Maintenance  
482 requires only low skills, and the solid fraction of the composted digestate could be utilized, too.  
483 While food production is less efficient, a high crop diversity can be attained. With scenario 2, the  
484 production efficiency (per m<sup>2</sup>) can be increased. Here, the residents cultivate the plants in vertical  
485 hydroponic tiers. Vertical tiers are more space-efficient, while through optimal nutrient  
486 availability, hydroponic cultivation systems allow a faster and higher crop production (Rorabaugh  
487 et al., 2002). For example, Li et al. (2018) realized in hydroponic systems about twice as much  
488 shoot fresh weight of two lettuce cultivars than for the cultivation in culture substrate. However,  
489 hydroponic systems require more experience and regular control of the composition of the  
490 nutrient solution (Savvas et al., 2008).

491 Better suited are scenario 3 and 4 because of the controlled or semi-controlled environment as  
492 in plant factories or greenhouses. In addition, increased dynamics of the crop water and nutrient  
493 demand like in scenario 2 create unfavorable situations with the necessity to discard parts of the  
494 nutrient solution (Goddek and Körner, 2019).

495 In scenario 3, the crop is cultivated in a roof-top greenhouse using hydroponics. This scenario  
496 enables very high year-round production but with a higher demand for heating and lighting (see  
497 table 3 in section 3.4). The energy consumption is, in particular between autumn and spring, very  
498 high. Furthermore a certain dynamic in water and nutrient demand, as well as in yield throughout  
499 the year is still present. In scenario 4, this dynamic is more or less completely eliminated. Here,

500 the plant factory is installed in the basement or rooms without natural light and the climate is  
501 fully controlled (SharathKumar et al., 2020). Due to the cultivation of crops in layers, even less  
502 space than for the roof-top greenhouse is needed. However, since there is no natural light, high  
503 amounts of artificial light for plant growth must be provided, and the exhaust heat needs to be  
504 removed. Thus, scenario 4 is, despite its higher productivity, a better product quality as well as a  
505 stable and constant harvest, the most energy demanding. In addition, it requires maintenance  
506 and resources all year round. As the community provides a year-round output in biowaste,  
507 continuous use of it can be best achieved with scenario 4. Thus, a decision must be made between  
508 the installation of a buffer system for seasonal provision of nutrient-rich irrigation water or a high  
509 energy demand. Next to that, non-technical issues also need to be taken into consideration, e.g.,  
510 the roof-top floor is highly desired by residents and the most expensive floor in the building. In  
511 contrast, skyscrapers contain inside rooms without daylight, which must not be used for  
512 apartments or offices, at least in Germany.

513

### 514 **3.2.2 Production potentials and energy demand of simulated scenarios**

515 To evaluate the potential of in-house food production, crop cultivation in protected environments  
516 with semi-closed and closed systems, i.e. greenhouses in scenario 3 and plant factories in scenario  
517 4, a model-based simulator tuned to the respective cases was developed. Scenarios 1 and 2 were  
518 neglected since their outcome varies, among other factors, highly on the residents' skills and  
519 motivation, which complicates simulations regarding pure bio-technological scenarios  
520 significantly. As one of the most common crops in plant factories and greenhouses, lettuce was  
521 chosen as a model crop because it is relatively easy to handle during cultivation (Karimaei et al.,  
522 2004), and it is suitable to produce lettuce even with wastewater (Sikawa and Yakupitiyage, 2010).  
523 Based on the N content in the liquid fraction from the biowaste digestate, it was calculated that  
524 the production of 6.3 t fresh mass of lettuce per year would be theoretically possible. A challenge  
525 for implementing closed hydroponic systems in the ICU concept is the open question after what  
526 time period the fertilizer has to be replaced due to the accumulation of salts (mainly sodium and  
527 other deleterious substances. However, in comparison to open systems (the drained nutrient  
528 solution is discarded), closed re-circulating hydroponic systems reduce water and fertilizer by  
529 about 30 % and 50 %, respectively (Van Os et al., 1999, Grewal et al. 2011).

530 Using the ICU concept, uncertainties in the dynamic of crop water demand in scenario 3 (through  
531 seasonal fluctuations) could result in an unwanted discharge of nutrient solution. This can partly  
532 be solved by increasing the area of the cultivation system. Therefore, the area for the greenhouse  
533 in scenario 3 was with 70 m<sup>2</sup> partly oversized. Due to that, all available N<sub>tot</sub> will be taken up by  
534 the crop. This dynamics is not relevant in scenario 4 and thus a perfect sizing of the plant factory  
535 is possible in this case. Accordingly, a total annual yield of 18 000 or 20 500 kg fresh lettuce (i.e.  
536 89.6 kg m<sup>-2</sup> or 259.37 kg m<sup>-2</sup>; table 1) was predicted for the greenhouse (scenario 3) and the plant  
537 factory (scenario 4), respectively. These values correspond to the yields reported in other studies

538 (Becker and Kläring, 2016; Gerbaud and André, 1999; Körner et al., 2018). In these scenarios, a  
 539 weekly harvest of roughly 2 000 or 3 800 lettuce heads in a 200 m<sup>2</sup> greenhouse or in a plant  
 540 factory can be expected. Since 1 kg of lettuce contains about 150 calories and, assuming a person  
 541 requires about 2 000 calories a day without burden, this would nourish about four people for one  
 542 year. However, while human nutrition is not covered solely by lettuce, in a real implementation  
 543 of innovative urban agriculture practitioners a broad mix of vegetables and herbs with various  
 544 nutritious values should be considered in follow-up studies (Armanda et al. 2019) (Table 2).

545

546 **Table 1:** Model output per m<sup>2</sup> ground area and year

| Scenario                                                                                          | Climate control energy [GJ m <sup>-2</sup> ] | Illumination energy [GJ m <sup>-2</sup> ] | Water: Evaporation and crop binding [L m <sup>-2</sup> ] | Fresh lettuce yield [kg m <sup>-2</sup> ] |
|---------------------------------------------------------------------------------------------------|----------------------------------------------|-------------------------------------------|----------------------------------------------------------|-------------------------------------------|
| <b>S3: Roof-top greenhouse (70 m<sup>2</sup> ground)</b>                                          | 2.0                                          | 0.4                                       | 1 805                                                    | 91                                        |
| <b>S3*: Roof-top greenhouse (500 m<sup>2</sup> ground)</b>                                        | 1.0                                          | 0.4                                       | 1 786                                                    | 90                                        |
| <b>S4: Basement vertical farming (30 m<sup>2</sup> ground; 70 m<sup>2</sup> cultivation area)</b> | 5.2                                          | 6.7                                       | 1 396                                                    | 259                                       |

547 S3\*: 500 m<sup>2</sup> greenhouse is for industry the smallest size for implementation.

548

549 On the downside: The roof-top greenhouse in scenario 3 ( m<sup>2</sup> ground) requires an annual amount  
 550 of ~182 GJ (50 550 kWh) energy for heating and 72.5 GJ (20 150 kWh) electrical power for light.  
 551 While the energy demand is highest during autumn and winter, the yield is highest in summer.  
 552 Thus, the efficiency of energy use strongly drops in the cold season. Using a cultivation period of  
 553 March to October requires only about 44 % of the energy for heat and 10 % for light. The latter,  
 554 however, would required an additional storage solution for crops during that period.  
 555 Furthermore, power consumption for greenhouse lighting depends on many parameters e.g.  
 556 geographical location, greenhouse cover light transmission, light source, crop, set points.  
 557 Comparable results for power demand in greenhouses as in scenario 3 were reported earlier  
 558 (Aaslyng et al., 2006; Körner et al., 2006; Mortensen and Stromme, 1987; Seginer et al., 2006).  
 559 The energy demands for the plant factory case in scenario 4 are even higher. This corresponds to  
 560 an annual electrical power demand of 201 GJ (56.1 MWh) per year. As each plant factory is unique  
 561 and large differences exist between implementations, e.g. he number of layers, layer size, empty  
 562 spacing (room use efficiency), light source, light set point, etc. the power consumption needs to  
 563 be compared taking into account the net production area and the net installed and used light

564 capacity. Based on our assumptions, the results obtained are in the same range as reported earlier  
565 (Kozai, 2013; Tong et al, 2013).

566  
567 **Table 2:** Potential biomass production per year for different vegetable crops based on the total  
568 available N amount in the liquid effluent and respective calories

| Crop            | Potential fresh mass [kg] | Calories [kcal/100 g] |
|-----------------|---------------------------|-----------------------|
| Broccoli        | 3050                      | 35*                   |
| Bush bean       | 5490                      | 25*                   |
| Brussel sprouts | 2771                      | 43*                   |
| Lettuce         | 7625                      | 11**                  |
| Spinach         | 3431                      | 23*                   |

569  
570 \* [https://www.foodspring.ch/magazine/wp-content/uploads/2020/10/FS\\_Kalorientabelle.pdf](https://www.foodspring.ch/magazine/wp-content/uploads/2020/10/FS_Kalorientabelle.pdf)  
571 \*\* <https://www.wikifit.de/kalorientabelle/gemuese/kopfsalat>

572  
573 The lettuce crop produced in scenario 4 using a full climate-controlled plant factory consumes 95  
574 % of the fertilizer of the ICU system when a (nearly) closed system is attained. About 36 m<sup>3</sup> water  
575 would be additionally needed if the evaporation water is not reused.

576 As both scenario 3 and 4 have a high energy demand, these solutions are not the best concerning  
577 the CO<sub>2</sub> footprint. However, to make controlled hydroponic systems more sustainable,  
578 regenerative energy could be used more intensively in this culture system, as it is already done  
579 for some urban farms (Armanda et al. 2019). Moreover, due to further advantages, like reduced  
580 water consumption and space requirements in comparison to a field cultivation, less transport  
581 and utilization of non-used spaces in the city, reliable and stable resource demand and crop yield,  
582 higher quality and food safety, there is a great potential for controlled and semi-controlled crop  
583 production in an urban scenario. Additionally, local food production is highly advantageous. In  
584 particular, it represents an alternative for highly-populated mega cities lacking space or for  
585 regions lacking agricultural areas.

586 To stress the full potential of the ICU concept, further extrapolations were performed. The  
587 complete fertilizer produced from the biowaste (N<sub>tot</sub> in liquid and solid fraction neglecting  
588 possible N-losses during further processing like composting and/or immobilisation processes)  
589 allows for the cultivation of about 19.5 t lettuce. Interestingly, the 720 l of black water produced  
590 by the residents already contain 183.95 kg NH<sub>4</sub>, which could be converted to 170.15 kg NO<sub>3</sub>. This  
591 amount per year could theoretically allow to produce 1.1 t/ m<sup>2</sup> lettuce in a roof-top greenhouse,  
592 and clearly demonstrates the potential of reusing nutrients from the digestate of biowaste and  
593 black water to produce food and nourish urban populations.

596

### 597 **3.3 Implementation of a ICU concept for a building with 100 residents saves up to 6,468 kg** 598 **CO<sub>2</sub>-eq**

599 Implementation of the ICU project for a building with 100 residents reduced CO<sub>2</sub>-emission due to  
600 reduced transport of 11 tons biowaste by 693 kg CO<sub>2</sub>. The reuse of NH<sub>4</sub> as fertilizer saved 2 363  
601 kg CO<sub>2</sub> compared to the new synthesis by the Haber-Bosch process. Usage of the produced 25  
602 855 m<sup>3</sup> biogas for heating saved 3 412 kg CO<sub>2</sub> and is comparable to the CO<sub>2</sub> fingerprint for heating  
603 reported in literature (Capponi et al., 2012). In total, the implementation of the ICU concept can  
604 save 6,468 kg CO<sub>2</sub>-eq. Based on a CO<sub>2</sub> emission price of 25 € per ton CO<sub>2</sub>, the CO<sub>2</sub> saving value is  
605 currently 161.7 € (BMU, 2021) (supplementary fig. 9).  
606

### 607 **3.4. ICU concept becomes economically feasible in large buildings and with growing food** 608 **prices**

609 To estimate the economic feasibility, yearly costs and yields of the ICU concept were estimated.  
610 Operation of an AD for biogenic waste (table 3, Biowaste Anaerobic Digester) costs 9 535–9 948  
611 € and yields 1 615-1 727 € annually. In contrast, operation of an AD for blackwater utilization costs  
612 8 594-8 758 € and yields 2 917-3 606 € annually. In consequence, the in-house use of biowaste  
613 and black water is not profitable for small buildings (Salerno et al., 2017). For large buildings,  
614 however, personal costs remain more or less the same and investment costs for larger fermenters  
615 rise only slightly. Therefore, implementation is economically feasible for large buildings or  
616 agglomeration of several buildings, favoring the ICU implementation in large cities or at the  
617 district level.

618 Generally, black water utilization is economically more promising than biowaste usage under the  
619 premise that the saved cost for the wastewater removal compensates for the black water  
620 system's cost. Combined usage of black water and biowaste would create the synergy that  
621 personal costs for the daily lookup and the co-generation unit can be shared.

622 The annual cost for a 70 m<sup>2</sup> greenhouse on the roof-top was 57 441 € (scenario 3), and in the  
623 basement 54 390 € (scenario 4). The benefit of both solutions is 11 418 – 14 737 €, based on a  
624 lettuce price of 0.87 €. Extrapolation showed that the system is profitable with lettuce prices of  
625 1.80 €. This rise is possible when the agricultural space vanishes further, and the population  
626 grows. For example, in Singapore, the lettuce price is already 1.00 -2.50 €. In contrast to the AD,  
627 the hydroponics' economic efficiency grows only slightly with larger systems since it scales quite  
628 well.

629 Whether the hydroponic should be integrated on the roof-top, in the basement, or in rooms  
630 without light depends heavily on the price. The top floor's rental price is roughly 30 % more  
631 expensive. So, it could bring more profit to use the top floor as a penthouse. In a prestigious  
632 skyscraper with around 100 m<sup>2</sup> of living space, a six-digit amount in major German cities is  
633 possible.

634 **Table 3: Summary of cost and yields.** Yields are considered from the point of the residents using  
 635 the energy and food for their personal need. References are below table. S3 = scenario 3, S4 =  
 636 scenario 4.

| Description                          | Size/amount                                             | Investment costs [€]            | Yearly costs [€] | Comments                                           |
|--------------------------------------|---------------------------------------------------------|---------------------------------|------------------|----------------------------------------------------|
| <b>Biowaste Anaerobic Digester</b>   |                                                         |                                 |                  |                                                    |
| Fermenter (CSTR, 2sR or PFR)         | 5 m <sup>3</sup>                                        | -20 000 to -25 000 <sup>1</sup> | -2 100 to 2 625  |                                                    |
| Co-generation unit                   | 2 m <sup>2</sup>                                        | -10 000                         | -1 050           |                                                    |
| Technicum mini plant                 | 15m <sup>2</sup> (2 000 (€/m <sup>2</sup> ))            | -30 000                         | -1 500           |                                                    |
| Employee for AD                      | 5 h/week á 25 Euro/h                                    | ---                             | -6 500           |                                                    |
| Biogas (used for electricity)        | 11 294 - 12 080 kWh                                     | ---                             | 1 615-1 727      | refer to biogas price (14.3 cent/kWh) <sup>2</sup> |
|                                      |                                                         | sum                             | -9 535 to -9 948 |                                                    |
| <b>Blackwater Anaerobic Digester</b> |                                                         |                                 |                  |                                                    |
| Fermenter (CSTR, 2sR or PFR)         | 7 m <sup>3</sup>                                        | -25 000 to -30 000 <sup>1</sup> | -2 625 to -3 150 |                                                    |
| Co-generation unit                   | 2 m <sup>2</sup>                                        | -10 000                         | -1 050           |                                                    |
| Technicum mini plant                 | 20m <sup>2</sup> (2 000 (€/m <sup>2</sup> ))            | -30 000                         | -1 500           |                                                    |
| Employee for AD                      | 5 h/week á 25 Euro/h                                    | ---                             | -6 500           |                                                    |
| Biogas (used for heating)            | 20 400 - 25 220 kWh                                     | ---                             | 2 917-3 606      | refer to biogas price (14.3 cent/kWh) <sup>2</sup> |
|                                      |                                                         | sum                             | -8 758 to -8 594 |                                                    |
| <b>Garden unit scenario 3</b>        |                                                         |                                 |                  |                                                    |
| roof-top greenhouse                  |                                                         |                                 |                  |                                                    |
| Greenhouse                           | 70 m <sup>2</sup>                                       | -140 000                        | -14 700          |                                                    |
| Lightning                            |                                                         | -13 986                         | -1 468           | 14 lights x 999 €                                  |
| Hydroponic module                    | 70 m <sup>2</sup>                                       | -9 200                          | -966             |                                                    |
| Soiling®NRF module                   | 1 x 300 l                                               | -70 000                         | -7 350           | refer to Jassen GmbH <sup>5</sup>                  |
| Soiling®NRF solid separator          | 1                                                       | -35 000                         | -3 675           |                                                    |
| Building-costs                       | One floor (70 m <sup>2</sup> á 2 000 €/m <sup>2</sup> ) | -140 000                        | -14 700          | -                                                  |
| Employee for garden unit             | 20 h/week á 25 Euro/h                                   | ---                             | -26 000          | 900 h per year <sup>6</sup>                        |
| Produced food (S3)                   | 13 125 lettuce (0.87 € each)                            | ---                             | 11 418           |                                                    |
|                                      |                                                         | sum                             | -57 441          |                                                    |
| <b>Garden unit scenario 4</b>        |                                                         |                                 |                  |                                                    |
| basement vertical farm               |                                                         |                                 |                  |                                                    |
| Vertical farming                     | 70 m <sup>2</sup>                                       | -150 000                        | -15 750          |                                                    |
| Lightning                            |                                                         | -6 540                          | -686             | 60 lights x 109 €                                  |
| Hydroponic module                    | 70 m <sup>2</sup>                                       | -9 200                          | -966             |                                                    |
| Soiling®NRF module                   | 1 x 300 l                                               | -70 000                         | -7 350           | refer to Jassen GmbH <sup>5</sup>                  |
| Soiling®NRF solid separator          | 1                                                       | -35 000                         | -3 675           |                                                    |
| Building-costs                       | One floor (70 m <sup>2</sup> á 2 000 €/m <sup>2</sup> ) | -140 000                        | -14 700          | -                                                  |
| Employee for garden unit             | 20 h/week á 25 Euro/h                                   | ---                             | -26 000          | 900 h per year <sup>6</sup>                        |
| Produced food (S4)                   | 16 940 lettuce (0.87 € each)                            | ---                             | 14 737           |                                                    |
|                                      |                                                         | sum                             | -54 390          |                                                    |

637

638

639

640

1. pers. communication AAT Abwasser- und Abfalltechnik GmbH, Konrad-Doppelmayer-Str. 17, 6960 Wolfurt, Austria
2. Regulations for the expansion of renewable energies (Renewable Energies Act - EEG 2021) § 43 Fermentation of biowaste (2017)
3. pers. Communication Mr. Huber , GEFOMA GmbH, Germany



- 641 4. pers. Communication Mr. Grantham, Heliospectra AB, Sweden
- 642 5. Waste transport Magdeburg: [https://www.magdeburg.de/Start/B%C3%BCrger-Stadt/Leben-in-](https://www.magdeburg.de/Start/B%C3%BCrger-Stadt/Leben-in-Magdeburg/Umwelt/Abfall/index.php?La=1&object=tx,37.3427.1&kat=&kuo=2&sub=0)
- 643 [Magdeburg/Umwelt/Abfall/index.php?La=1&object=tx,37.3427.1&kat=&kuo=2&sub=0](https://www.magdeburg.de/Start/B%C3%BCrger-Stadt/Leben-in-Magdeburg/Umwelt/Abfall/index.php?La=1&object=tx,37.3427.1&kat=&kuo=2&sub=0)Jassen Kunststoffzentrum GmbH, Germany
- 644 6. Average price of 4 Discounter 0.87 €
- 645

### 646 **3.5 High motivation of stakeholders for the implementation of an ICU concept but high legal** 647 **barriers**

#### 649 **3.5.1 High motivation of residents for a sustainable lifestyle**

650 Current studies show that in Germany, a sustainable lifestyle becomes more and more important  
651 (Tölkes et al. 2018). Today, 657 urban gardening projects exist in Germany (Winkler et al., 2019).  
652 However, the engagement of residents in urbane gardening might decline and require strategies  
653 to counteract. In contrast, a professional management of the urban gardening projects is more  
654 reliable but often reduces the acceptance of residents (Specht et al. 2016). A compromise could  
655 be combined models with hydroponic modules for the residents or a botanic garden with a cafe  
656 alongside professionally managed greenhouses.

657

#### 658 **3.5.2 Real estate owners would implement the ICU project as long as it is profitable.**

659 Almost all real estate owners participating in this survey considered sustainable building as  
660 important for their business. Nevertheless, closed material cycles or exploitation of options  
661 related to the operation of AD or plant cultivation seemed less important for most of them. Some  
662 may even lose their tax benefits when they engage in another business field like urbane  
663 agriculture or operation of an AD. Therefore, it seems beneficial to outsource the operation of an  
664 ICU project to a contracting partner or a cooperative of the residents. Necessary conditions for  
665 implementing ICU concepts for real estate owners are high acceptance of the residents, lower  
666 maintenance requirements and profitability. Typically, there is no interest in pure flagship  
667 projects. Furthermore, especially for the roof-top use of buildings, ICU projects compete with  
668 other more established sustainable solutions such as the operation of photovoltaic systems  
669 (supplementary file 8).

670

#### 671 **3.5.3 In the framework of the Paris agreements, government promote a CO<sub>2</sub>-society**

672 In the Paris Agreement, 195 states including the European Union agreed to limit global warming  
673 below 2° C ([www.unfccc.int/process-and-meetings/the-paris-agreement/the-paris-agreement](http://www.unfccc.int/process-and-meetings/the-paris-agreement/the-paris-agreement)).  
674 Therefore, netto CO<sub>2</sub> emission has to be reduced to zero by 2040. In addition to the targets for  
675 the energy and building sector, new goals and measures are also being set for agriculture. In  
676 Germany, 8 % (72 million tons of CO<sub>2</sub>-eq) of the greenhouse gas emission came from agriculture  
677 in 2014. Despite the fact that of most agricultural greenhouse gas emissions are caused by natural  
678 physiological processes, the ability to reduce them is limited. The largest source with about 25  
679 million tons of CO<sub>2</sub>-eq is the use of N fertilizers. The use of organic nutrients considered in the ICU

680 project, in particular the soiling<sup>®</sup>-products, are one important step towards minimization of the  
681 N use. The main goal until 2030 is to significantly reduce the emissions of mineralic fertilizers in  
682 agriculture. One option is to use financing instruments under the Common Agricultural Policy.  
683 Another option is to increase the percentage of land used for organic farming by circular economy  
684 approaches (Klimaschutzplan 2050: <https://www.bmu.de/publikation/klimaschutzplan-2050/>).

### 685 686 **3.5.4 ICU implementations must fulfill high legal standards favoring large projects or tiny ones** 687 **for personal need**

688 The implementation of ICU projects requires observing the laws of the state. In the following, the  
689 most critical regulations for implementation ICU concepts in Germany are exemplarily addressed.  
690 One important factor is to fulfill the guidelines for building security (BauGB §29-§38, in particular  
691 admissibility of projects §34, BauNVO). Additionally, urban development plans and urban  
692 planning law must be complied with. Biogas production using AD for biowaste and black water is  
693 critical since biogas is flammable and requires sufficient ventilation. Therefore, the storage of  
694 large biogas volumes should be avoided. The produced biogas should be consumed immediately,  
695 upgraded to natural gas, fed in the gas grid, or outsourced from the buildings (Schmidt-Eichstaedt,  
696 2019). Nevertheless, fire prevention (§§ 3 and 14 MBO) and explosion control (DGUV Regel 113-  
697 001, Frigger et al., 2019) must be considered. For the removal of black water digestate and the  
698 solid fraction of the biowaste fermentation, the laws for sludge disposal have to be considered  
699 (AbfklärV, Queitsch et al., 2018). Utilization of the biowaste as fertilizer requires compliance with  
700 the German laws for biowaste (Bioabfallverordnung (BioAbfV)) and fertilizer ordinance (DüMV)  
701 as well as the EU regulations for fertilizer ordinance (EU-FPR). In particular, base materials must  
702 be allowed (DüMV, supplementary 2, table 7). The fertilizer has to be listed in a positive list  
703 (DüMV, supplementary 1, table 1) or equals any allowed fertilizer type. Furthermore, emission  
704 limits (DüMV, supplementary 2, table 1.4) and minimum hygiene requirements (§ 5 DüMV) have  
705 to be fulfilled. Exception exist in the case the biowaste and the produced fertilizer are only used  
706 for personal needs. However, it is questionable if biowaste utilization in a cooperative of more  
707 than 100 residents accounts as a personal need. Due to the high legal requirements, the  
708 implementation of ICU concepts seems only manageable for large projects or tiny  
709 implementations for personal needs (supplementary file 3). Another question is liability, which is  
710 difficult to address in general and usually depends on the specific case. Therefore no general  
711 recommendation can be given here, except to address this issue in a contract between the  
712 stakeholders (supplementary file 6).

### 713 **3.5.5 Communication and participation are important for the acceptance of residents**

714 Implementation of ICU projects require the participation of the residents. Residents have to  
715 separate the biowaste accurately, agree to install vacuum toilets and use the urban gardens either



716 as gardeners or as consumers. In general, there is a high acceptance in Germany to waste  
717 separation (Walk et al., 2019), vacuum toilets (Poortvliet et al., 2018), and urban gardening  
718 (Winkler et al., 2019). However, it is always useful to integrate all stakeholders as early as possible  
719 to successfully implement projects (García-Sánchez et al., 2018) and, in addition, to guide their  
720 participation by teaching material.

721 Furthermore, it is recommended to communicate potential risks (Xia et al., 2018). For example,  
722 ICU operation has the risk of microbial contamination of the food collected. Pretreatment of  
723 biomass at 70 °C can ensure the inactivation of harmful microorganisms. Another issue is the  
724 produced biogas, which is explosive. However, when immediately consumed, the risk is reduced  
725 to the level of a conventual gas heater.

726 An important cultural aspect is the utilization of black water as fertilizer. Theoretically, animal  
727 dung or manure usage and spreading it on fields are quite similar to the use of black water  
728 digestate for hydroponics. However, this is neither allowed nor accepted (Gell et al., 2011).

729

### 730 **3.6 Strategies to extend the ICU concept**

731 The ultimate goal of the ICU project is to close energy and material flow cycles in an urbane  
732 building. Additional components could increase yields and productivity and allow for a more  
733 robust operation.

734 For example, hydroponic modules for the balcony could be added, or food production can be  
735 elevated by aquaponic (Chia et al., 2018) or algae cultivation (Wongkiew et al., 2017). For an  
736 implementation, strategies to combine agriculture with photovoltaic could also be implemented  
737 (Navarte et al., 2018, Putri et al., 2018). For hot and dry areas, the ICU concept could be extended  
738 to include the water cycle (Liuzzo, 2016). For example, greywater can be reused (Hertel et al.,  
739 2015) or rainwater could be used for adiabatic cooling. In order to achieve a more robust  
740 operation, a module for cleaning the biowaste, for example, via conveyor belts, can be added  
741 (Verma et al., 2002). Also, storage capacities for biowaste, biogas, or fertilizers can be added.  
742 However, additional stores in the building are expensive and increase the fire load.

743

## 744 **4. Conclusions**

745 Integrating biomass cycles into residential buildings, as proposed by the ICU concept, is  
746 technically feasible, reduces CO<sub>2</sub> emission, and is of interest to owners of urband buildings and  
747 their residents. It is profitable for implementation in large buildings or agglomeration of buildings  
748 and in case food prices further increase. However, to achieve this goal, it will require the  
749 implementation of prototypes to perfect technical details and to confirm economic and material  
750 calculations. Major challenges for the implementation come from legal aspects relate to the  
751 biowaste prescription (the German BioAbfV) and the fertilizer prescription (the German DüMV).  
752 In sum, the results of this study should bring us one step closer to a reduction in land use and to  
753 a sustainable, CO<sub>2</sub>-neutral society.

754

## 755 **5. Figures & table**

756 **Fig.1: Process chart of ICU concept.** □: Integrated Cycles for Urban Biomass (IUC) processes. ○: Input of biomass through the building complex into the process; outputs like solid fraction and  
757 digestate. “...”: additional blackwater for biogas production.

759 **Fig.2: Simba model for in-house degradation of biowaste to heat and electricity.** 1. Biomass  
760 input of biogenic waste and blackwater with 70 °C pre-treatment. 2. The Converter block  
761 determines the biomass composition. 3. The Fermenter block determines the biogas and digestate  
762 output. 4. The Gas analysis determines the biogas composition. 5. The CHP block converts biogas  
763 into energy with a calorific value of 10.5 kJ/kg 6. The Separation block determines thick (solid) and  
764 thin (liquid) fractions.

765 **Fig.3: System boundaries of the Life Cycle Assessment study.** A: System environments of the  
766 product life-cycles based on DIN 15804 in four steps and system boundary (functional unit 1 m<sup>3</sup>  
767 biogas). B: System boundary for the ICU concept in comparison to a building with transport of  
768 biowaste to a conventional biogas plant. (Energy: <https://biogas.fnr.de/daten-und-fakten/faustzahlen>).

770 **Fig.4: Evaluation of reactor scenarios with biowaste fermenters.** Energy content of the biogas  
771 produced annually (without losses). Only biowaste input. For PFR reactor the sum of all 5  
772 fermenters and for 2sR is hydrolyse + main fermenter are considered. Star shows the chosen  
773 reactor size.

774 **Fig.5: Evaluation of reactor scenarios with additional blackwater fermenter.** Energy content of  
775 the biogas produced annually (without losses). Blackwater input. For PFR reactor the sum of all 5  
776 fermenters and for 2sR is hydrolyse + main fermenter are considered. Star shows the chosen  
777 reactor size.

778 **Fig.6: Dynamic behavior of the ICU model.** Feed fluctuations: Energy production from biowaste  
779 (green) and additional black water (BW) (brown) for 2sR, CSTR and PFR fermenters. i: Initiation  
780 phase of the model. ii. Feeding rate of 33.6 kg/d iii. Feeding rate of 41.1 kg/d iv. Feeding rate of  
781 30.7 kg/d for five days a week.

782 **Fig.7: N flow according to the Simba model.**  $N_{tot}$  = total nitrogen,  $NH_4$  = ammonium,  $NH_3$  =  
783 ammonia,  $NO_3$  = nitrate. Quantities relate to one year.

784 **Fig.8: Relative assessment of the cultivation scenarios.** Scenario 1: roof-top raised-bed,  
785 community residents; Scenario 2: roof-top vertical hydroponic system, community residents;  
786 Scenario 3: roof-top greenhouse, professional management; Scenario 4: basement vertical farm,  
787 professional management.

788 **Fig.9: LCA comparison between ICU-concept and conventional building.** Diagram shows the  
789 impact indicators for ICU and conventional building in %.

790

791

792

## 793 **6. Supplementary**

794 File 1: Fluctuation of biomass

795 File 2: Simba parameter

796 File 3: Matlab parameter for crop model

797 File 4: openLCA parameters

798 File 5: Online questionnaire

799 File 6: Calculation for optimal fermenter size for hydrolysis

800 File 7: Results online questionnaire

801 File 8: Legal aspects

802

## 803 **7. Acknowledgement**

804 The authors acknowledge the financial support by a funding program of the Fachagentur  
805 Nachwachsende Rohstoffe e.V. (FNR, FPNR). We additionally thank the GEFOMA GmbH for the  
806 estimation of costs of greenhouse construction. Jennifer Uebbing received funding from the EU-  
807 program ERDF (European Regional Development Fund) of the German Federal State Saxony  
808 Anhalt by Research Center of Dynamic Systems (CDS).

## 809 **Disclosure**

810 Jassen Kunststoff GmbH was one of the co-authors of this feasibility study. B. Illenberger and M.  
811 Illenberger provided estimates for quantification of the soiling<sup>®</sup>-process and compared the  
812 conversion of NH<sub>3</sub> to NO<sub>3</sub> with oxygen feed. Jassen Kunststoff GmbH has a commercial interest in  
813 selling soiling<sup>®</sup>-modules. Both B. Illenberger and M. Illenberger confirm that they have carried out  
814 their evaluation to the best of their knowledge and judgment.

815

## 816 **8. Literature**

- 817 1. Aaslyng, J. M., Andreassen, A. U., Körner, O., Lund, J. B., Jakobsen, L., Pedersen, J. S., ... & Rosenqvist, E. (2005, June).  
818 Integrated optimization of temperature, CO<sub>2</sub>, screen use and artificial lighting in greenhouse crops using a photosynthesis  
819 model. In *V International Symposium on Artificial Lighting in Horticulture 711* (pp. 79-88). Agelidou, E., Schwärzle, A., &  
820 Hasemann, S. (2019). Mikrogasturbinen-basiertes Mikro-BHKW für den Einsatz in Einfamilienhäusern (MGT- $\mu$ BHKW).
- 821 2. Andor, M. A., Frondel, M., & Sommer, S. (2018). Equity and the willingness to pay for green electricity in Germany. *Nature*  
822 *Energy*, 3(10), 876-881.
- 823 3. Anonymous (2013). Standard for Performance Rating of Commercial Refrigerated Display Merchandisers and Storage  
824 Cabinets. (ANSI/AHRI, ed.)
- 825 4. Armanda, D. T., Guinée, J. B., & Tukker, A. (2019). The second green revolution: Innovative urban agriculture's contribution  
826 to food security and sustainability—A review. *Global Food Security*, 22, 13-24. Bailey, B. J., and Seginer, I. (1989). Optimum  
827 control of greenhouse heating. *Acta Horticulturae* **245**, 512-518.
- 828 5. Barreca, F. (2016). Rooftop gardening. A solution for energy saving and landscape enhancement in Mediterranean urban  
829 areas. *Procedia-Social and Behavioral Sciences*, 223, 720-725.
- 830 6. Bensmann, A., Hanke-Rauschenbach, R., & Sundmacher, K. (2013). Reactor configurations for biogas plants—a model based  
831 analysis. *Chemical Engineering Science*, 104, 413-426.
- 832 7. Bensmann, B., Hanke-Rauschenbach, R., Müller-Syring, G., Henel, M., & Sundmacher, K. (2016). Optimal configuration and  
833 pressure levels of electrolyzer plants in context of power-to-gas applications. *Applied energy*, 167, 107-124.
- 834 8. Brechner, M., Both, A. J., & Staff, C. E. A. (1996). Hydroponic lettuce handbook. *Cornell Controlled Environment Agriculture*,  
835 504-509.

- 836 9. Bundesministerium für Umwelt, Naturschutz und nukleare Sicherheit (BMU) 2021: <https://www.bmu.de/service/haeufige-frag-faq/fragen-und-antworten-zur-einfuehrung-der-co2-bepreisung-zum-1-januar-2021/>  
837
- 838 10. Cammarisano, L., Donnison, I. S., & Robson, P. R. (2020). Producing Enhanced Yield and Nutritional Pigmentation in Lollo Rosso Through Manipulating the Irradiance, Duration, and Periodicity of LEDs in the Visible Region of Light. *Frontiers in plant science*, 11.  
839
- 840 11. Capponi, S., Fazio, S., & Barbanti, L. (2012). CO2 savings affect the break-even distance of feedstock supply and digestate placement in biogas production. *Renewable energy*, 37(1), 45-52.  
841
- 842 12. Carotti, L., Graamans, L., Puksic, F., Butturini, M., Meinen, E., Heuvelink, E., & Stanghellini, C. (2020). Plant factories are heating up: hunting for the best combination of light intensity, air temperature and root-zone temperature in lettuce production. *Frontiers in plant science*, 11, 2251.  
843
- 844 13. Chia, S. R., Ong, H. C., Chew, K. W., Show, P. L., Phang, S. M., Ling, T. C., ... & Chang, J. S. (2018). Sustainable approaches for algae utilisation in bioenergy production. *Renewable energy*, 129, 838-852.  
845
- 846 14. CornellCEA (2014). *Cornell Controlled Environment Agriculture*. <http://www.cornellcea.com/>  
847
- 848 15. DEMİRBAŞ, Nevin. "Vertical Agriculture: A Review of Developments." *Cataloging-In-Publication Data* (2019): 633-639.  
849
- 850 16. ENBW, Mikrogasturbine im Kraftwerk und Zuhause. Available at  
851 <https://www.enbw.com/unternehmen/konzern/forschung/erneuerbare-energien/mikrogasturbine.html>, (accessed  
852 14.01.2021)
- 853 17. DüMV. (2012). Düngemittelverordnung, Verordnung über das Inverkehrbringen von Düngemitteln, Bodenhilfsstoffen, Kultursubstraten und Pflanzenhilfsmitteln.  
854
- 855 18. Finkbeiner, M., Inaba, A., Tan, R., Christiansen, K., & Klüppel, H. J. (2006). The new international standards for life cycle assessment: ISO 14040 and ISO 14044. *The international journal of life cycle assessment*, 11(2), 80-85.  
856
- 857 19. Frigger, A. (2019). Wie schütze ich was? Expertentipps zum Explosionsschutz: Wie können welche Anlagenteile optimal geschützt werden. *CITplus*, 22(12), 34-35.  
858
- 859 20. Frondel, M., Ritter, N., & Sommer, S. (2015). Stromverbrauch privater Haushalte in Deutschland—Eine ökonomische Analyse. *Zeitschrift für Energiewirtschaft*, 39(3), 221-232.  
860
- 861 21. Fuldauer, L. I., Parker, B. M., Yaman, R., & Borrión, A. (2018). Managing anaerobic digestate from food waste in the urban environment: Evaluating the feasibility from an interdisciplinary perspective. *Journal of Cleaner Production*, 185, 929-940.  
862
- 863 22. Gao, M., Zhang, L., Florentino, A. P., & Liu, Y. (2019). Performance of anaerobic treatment of blackwater collected from different toilet flushing systems: Can we achieve both energy recovery and water conservation?. *Journal of hazardous materials*, 365, 44-52.  
864
- 865 23. García-Sánchez, E., García-Morales, V. J., & Martín-Rojas, R. (2018). Analysis of the influence of the environment, stakeholder integration capability, absorptive capacity, and technological skills on organizational performance through corporate entrepreneurship. *International Entrepreneurship and Management Journal*, 14(2), 345-377.  
866
- 867 24. Gell, K., De Ruijter, F. J., Kuntke, P., De Graaff, M., & Smit, A. L. (2011). Safety and effectiveness of struvite from black water and urine as a phosphorus fertilizer. *Journal of Agricultural Science*, 3(3), 67.  
868
- 869 25. Gerbaud, A., & Andre, M. (1999). Down regulation of photosynthesis after CO<sub>2</sub> enrichment of lettuce; relation to photosynthetic characteristics.  
870
- 871 26. Goddek, S., & Körner, O. (2019). A fully integrated simulation model of multi-loop aquaponics: a case study for system sizing in different environments. *Agricultural Systems*, 171, 143-154.  
872
- 873 27. Graamans, L., Baeza, E., Van Den Dobbelsteen, A., Tsafaras, I., & Stanghellini, C. (2018). Plant factories versus greenhouses: Comparison of resource use efficiency. *Agricultural Systems*, 160, 31-43.  
874
- 875 28. Grewal, H. S., Maheshwari, B., & Parks, S. E. (2011). Water and nutrient use efficiency of a low-cost hydroponic greenhouse for a cucumber crop: An Australian case study. *Agricultural Water Management*, 98(5), 841-846.  
876
- 877 <https://doi.org/10.1016/j.agwat.2010.12.010>.  
878
- 879 29. Hanc, A., Novak, P., Dvorak, M., Habart, J., & Svehla, P. (2011). Composition and parameters of household bio-waste in four seasons. *Waste Management*, 31(7), 1450-1460.  
880
- 881 30. Harbick, K., & Albright, L. D. (2016, May). Comparison of energy consumption: greenhouses and plant factories. In *VIII International Symposium on Light in Horticulture 1134* (pp. 285-292).  
882
- 883 31. Hasemann S. „Abschlussbericht EnBW Patenschaft“ DLR Verbrennungstechnik (2015).  
884
- 885 32. Kathrin, H., Stefanie, B., SWF, O. O., & Hans-Werner, O. (2017). Eco-innovations in the German fertilizer supply chain: Impact on the carbon footprint of fertilizers. *Plant, Soil and Environment*, 63(12), 531-544.  
886
- 887 33. Hertel, S., Navarro, P., Deegener, S., & Körner, I. (2015). Biogas and nutrients from blackwater, lawn cuttings and grease trap residues—experiments for Hamburg's Jenfelder Au district. *Energy, Sustainability and Society*, 5(1), 1-17.  
888
- 889 34. Institute for automation and communication, ifak, 2020. *SIMBA Portal*. [Online] Available at:  
890 <https://www.ifak.eu/de/produkte/simba-biogas> (Accessed 11 August 2020).

- 891 35. Jouhara, H., Czajczyńska, D., Ghazal, H., Krzyżyńska, R., Anguilano, L., Reynolds, A. J., & Spencer, N. (2017). Municipal waste  
892 management systems for domestic use. *Energy*, *139*, 485-506.
- 893 36. Karimaei, M. S., Massiha, S., & Mogaddam, M. (2001, September). COMPARISON OF TWO NUTRIENT SOLUTIONS' EFFECT  
894 ON GROWTH AND NUTRIENT LEVELS OF LETTUCE (*LACTUCA SATIVA* L.) CULTIVARS. In *International Symposium on Growing*  
895 *Media and Hydroponics 644* (pp. 69-76).
- 896 37. Karlsson, J. (2017). Modeling and simulation of existing biogas plants with SIMBA# Biogas.
- 897 38. Kozai, T. (2012, May). Sustainable plant factory: Closed plant production systems with artificial light for high resource use  
898 efficiencies and quality produce. In *International Symposium on Soilless Cultivation 1004* (pp. 27-40).
- 899 39. Körner, O., Aaslyng, J. M., Andreassen, A. U., & Holst, N. (2007). Microclimate prediction for dynamic greenhouse climate  
900 control. *HortScience*, *42*(2), 272-279.
- 901 40. Körner, O., Andreassen, A. U., & Aaslyng, J. M. (2006). Simulating dynamic control of supplementary lighting. In *V*  
902 *International Symposium on Artificial Lighting in Horticulture 711* (pp. 151-156).
- 903 41. Körner, O., & Hansen, J. B. (2012, November). An on-line tool for optimising greenhouse crop production. In *IV*  
904 *International Symposium on Models for Plant Growth, Environmental Control and Farm Management in Protected*  
905 *Cultivation- 957* (pp. 147-154).
- 906 42. Korner, O., Pedersen, J. S., & Jægerholm, J. (2018). Simulating lettuce production in a multilayer moving gutter system.
- 907 43. Körner, O., Warner, D., Tzivilakis, J., Eveleens, B., & Heuvelink, E. (2008). Decision support for optimising energy  
908 consumption in European greenhouses. In *International Symposium on High Technology for Greenhouse System*  
909 *Management: Greensys2007 801* (pp. 803-810).
- 910 44. Liebetrau, J., Pfeiffer, D., & Thrän, D. (2016). Collection of Methods for Biogas—Methods to Determine Parameters for  
911 Analysis Purposes and Parameters that Describe Processes in the Biogas Sector. *DBFZ Deutsches Biomasseforschungszentrum*  
912 *gemeinnützige GmbH: Fischer Druck, Leipzig, Germany*. Körner, O. (2004). Evaluation of crop photosynthesis models for  
913 dynamic climate control. *Acta Horticulturae* **654**, 295-302.
- 914 45. Lingstädt, T., Seliger, H., Reh, S., & Huber, A. 2.2 b Dezentrale Kraftwerke (Motoren und Turbinen) innerhalb des  
915 Forschungsprojekts TF\_Energiewende.
- 916 46. Lugmayr, Roman „Technisch-wirtschaftlicher Vergleich eines Gasmotors mit einer Mikrogasturbine“ (2010): Bachelorarbeit,  
917 FH Oberösterreich, Wels
- 918 47. Li, Q., Li, X., Tang, B., & Gu, M. (2018). Growth responses and root characteristics of lettuce grown in aeroponics,  
919 hydroponics, and substrate culture. *Horticulturae*, *4*(4), 35.
- 920 48. Queitsch, P. (2018). Die neue Klärschlamm-Verordnung und die Rechtsfolgen für die Entsorgungspraxis. *Zeitschrift für das*  
921 *Recht der Abfallwirtschaft*, *17*(2), 78-85.
- 922 49. Liuzzo, L., Notaro, V., & Freni, G. (2016). A reliability analysis of a rainfall harvesting system in southern Italy. *Water*, *8*(1),  
923 18.
- 924 50. Lombardi, L. (2003). Life cycle assessment comparison of technical solutions for CO<sub>2</sub> emissions reduction in power  
925 generation. *Energy conversion and management*, *44*(1), 93-108.
- 926 51. Luste, S., & Luostarinen, S. (2010). Anaerobic co-digestion of meat-processing by-products and sewage sludge—Effect of  
927 hygienization and organic loading rate. *Bioresource Technology*, *101*(8), 2657-2664.
- 928 52. Malakahmad, A., Basri, N. A., & Zain, S. M. (2008). An application of anaerobic baffled reactor to produce biogas from  
929 kitchen waste. *WIT Transactions on Ecology and the Environment*, *109*, 655-664.
- 930 53. McDonough, W., & Braungart, M. (2010). *Cradle to cradle: Remaking the way we make things*. North point press.
- 931 54. Mortensen, L. M., & Strømme, E. (1987). Effects of light quality on some greenhouse crops. *Scientia horticulturae*, *33*(1-2),  
932 27-36.
- 933 55. Poortvliet, P. M., Sanders, L., Weijma, J., & De Vries, J. R. (2018). Acceptance of new sanitation: The role of end-users' pro-  
934 environmental personal norms and risk and benefit perceptions. *Water Research*, *131*, 90-99.
- 935 56. Putri, R. K., Astuti, Y. D. R. W., Wardhany, A. K., & Hudaya, C. (2018, March). Building integrated photovoltaic for rooftop  
936 and facade application in Indonesia. In *2018 2nd International Conference on Green Energy and Applications (ICGEA)* (pp.  
937 171-175). IEEE.
- 938 57. Rorabaugh, P., Jensen, M., and Giacomelli, G. A. (2002). Introduction to controlled environment agriculture and hydroponics.  
939 pp. 1-130, Controlled Environment Agriculture Center
- 940 58. Salerno, M. A. R. I. A. N. G. E. L. A., Gallucci, F. R. A. N. C. E. S. C. O., Pari, L. U. I. G. I., Zambon, I. L. A. R. I. A., Sarri, D. A. N. I.  
941 E. L. E., & Colantoni, A. N. D. R. E. A. (2017). Costs-benefits analysis of a small-scale biogas plant and electric energy  
942 production. *Bulgarian Journal of Agricultural Science*, *23*(3), 357-362.
- 943 59. Sapkota, S., Sapkota, S., & Liu, Z. (2019). Effects of nutrient composition and lettuce cultivar on crop production in  
944 hydroponic culture. *Horticulturae*, *5*(4), 72.
- 945 60. Savvas, D., Chatzieustratiou, E., Pervolaraki, G., Gizas, G., & Sigrimis, N. (2008). Modelling Na and Cl concentrations in the  
946 recycling nutrient solution of a closed-cycle pepper cultivation. *Biosystems engineering*, *99*(2), 282-291.



- 947 61. Schmidt-Eichstaedt, G. (2019, July). Anwendungsbereich und Abgrenzungsfragen bei Entwicklungs- und  
948 Ergänzungssatzungen nach § 34 Abs. 4 Satz 1 Nr. 2 und 3 BauGB. In *Schaffung von Bauland* (pp. 181-196). Nomos  
949 Verlagsgesellschaft mbH & Co. KG.
- 950 62. Seginer, I., Albright, L. D., & Ioslovich, I. (2006). Improved strategy for a constant daily light integral in greenhouses.  
951 *Biosystems engineering*, 93(1), 69-80.
- 952 63. SharathKumar, M., Heuvelink, E., & Marcelis, L. F. (2020). Vertical farming: moving from genetic to environmental  
953 modification. *Trends in plant science*, 25(8), 724-727.
- 954 64. Sikawa, D. C., & Yakupitiyage, A. (2010). The hydroponic production of lettuce (*Lactuca sativa* L) by using hybrid catfish  
955 (*Clarias macrocephalus* × *C. gariepinus*) pond water: Potentials and constraints. *Agricultural water management*, 97(9),  
956 1317-1325.
- 957 65. Specht, K., Weith, T., Swoboda, K., & Siebert, R. (2016). Socially acceptable urban agriculture businesses. *Agronomy for  
958 sustainable development*, 36(1), 17.
- 959 66. Scheftelowitz, M., Daniel-Gromke, J., Denysenko, V., Sauter, P. N. K., Krautz, A., Beil, M. & Reinicke, F. (2013).  
960 „Stromerzeugung aus Biomasse O3MAP250-Zwischenbericht,“. *Deutsches Biomasseforschungszentrum gemeinnützige  
961 GmbH, Leipzig*, 15.
- 962 67. Tölkes, C., & Butzmann, E. (2018). Motivating pro-sustainable behavior: The potential of green events—A case-study from  
963 the Munich Streetlife Festival. *Sustainability*, 10(10), 3731.
- 964 68. UBA (Hrsg.) (2008): Hintergrundpapier zu einer multimedialen Stickstoffemissionsminderungsstrategie. September 2008.
- 965 69. Os, E. V. (1999). Sustainable Water Use in (Agro) industry and Agriculture-Closed soilless growing systems: A sustainable  
966 solution for Dutch greenhouse horticulture. *Water Science and Technology*, 39(5), 105-112.
- 967 70. Verma, S. (2002). Anaerobic digestion of biodegradable organics in municipal solid wastes. *Columbia University*, 7(3), 98-  
968 104.
- 969 71. Wagner, I. J., & Eng, F. S. B. (2015). Potenzialanalyse zur Energieeinsparung, Steigerung der Energieeffizienz und Einsatz  
970 erneuerbarer Energien mit Entwicklung eines Zukunftskonzepts am Beispiel der Kläranlage Eversburg in Osnabrück—2.  
971 Phase.
- 972 72. Walk, S., Wardle, D., Deegener, S., & Körner, I. (2019). Improving the quality and quantity of source-separated household  
973 food waste in areas of different socio-economic characteristics: a case study from Lübeck, Germany. In *16th International  
974 Conference on Environmental Science and Technology (CEST2019)*.
- 975 73. Wang, L., Xu, X., & Zhang, M. (2017). Effects of intermittent aeration on the performance of partial nitrification treating  
976 fertilizer wastewater. *China Environmental Science*, 37(1), 146-153.
- 977 74. Wernet, G., Bauer, C., Steubing, B., Reinhard, J., Moreno-Ruiz, E., & Weidema, B. (2016). The ecoinvent database version 3  
978 (part I): overview and methodology. *The International Journal of Life Cycle Assessment*, 21(9), 1218-1230.
- 979 75. Winkler, B., Maier, A., & Lewandowski, I. (2019). Urban gardening in Germany: Cultivating a sustainable lifestyle for the  
980 societal transition to a bioeconomy. *Sustainability*, 11(3), 801.
- 981 76. Wongkiew, S., Hu, Z., Chandran, K., Lee, J. W., & Khanal, S. K. (2017). Nitrogen transformations in aquaponic systems: A  
982 review. *Aquacultural Engineering*, 76, 9-19.
- 983 77. Wriege-Bechtold, A. (2015). Anaerobe Behandlung von Braunwasser und Klärschlamm unter Berücksichtigung von Co-  
984 Substraten.
- 985 78. Xia, N., Zou, P. X., Griffin, M. A., Wang, X., & Zhong, R. (2018). Towards integrating construction risk management and  
986 stakeholder management: A systematic literature review and future research agendas. *International Journal of Project  
987 Management*, 36(5), 701-715.
- 988

## Figures

**Figure 1**

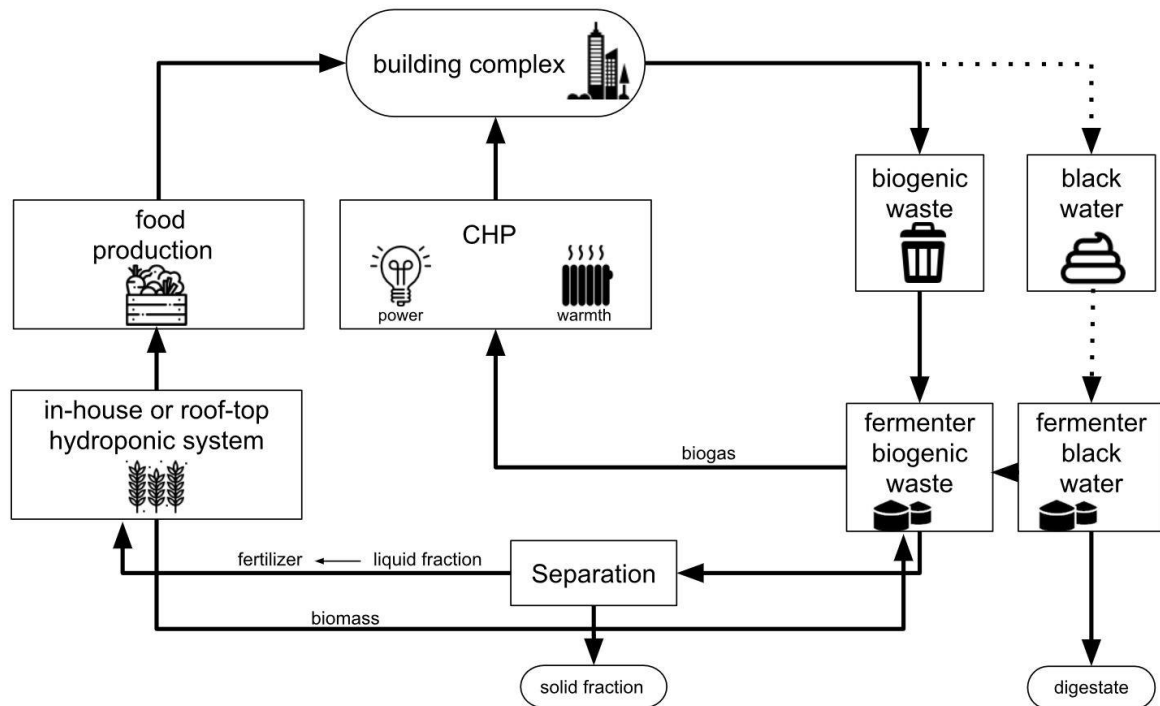

**Process chart of ICU concept.** □: Integrated Cycles for Urban Biomass (IUC) processes. ○: Input of biomass through the building complex into the process; outputs like solid fraction and digestate. “.....”: additional blackwater for biogas production.

**Figure 2**

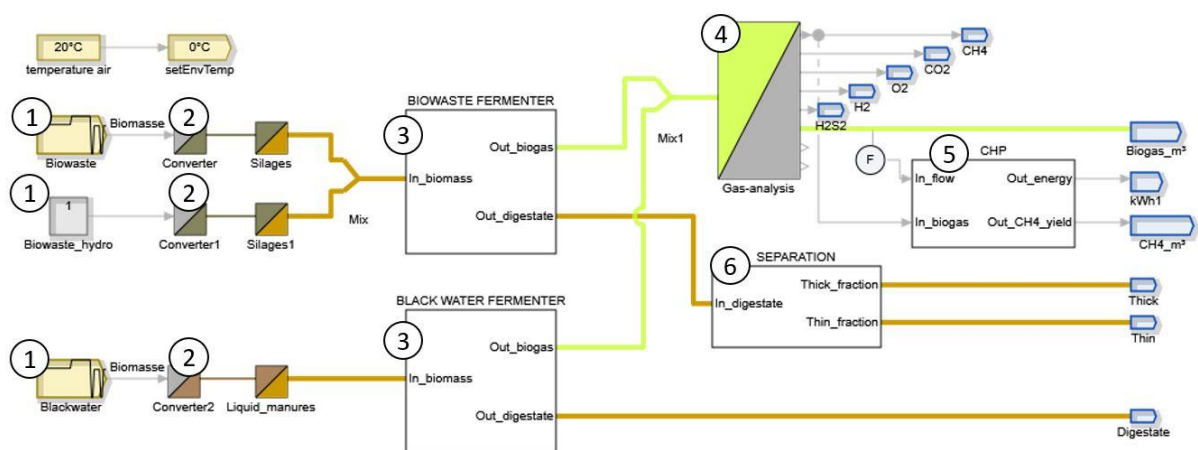

**Simba model for in-house degradation of biowaste to heat and electricity.** 1. Biomass input of biogenic waste and blackwater with 70 °C pre-treatment. 2. The Converter block determines the biomass composition. 3. The Fermenter block determines the biogas and digestate output. 4. The Gas analysis determines the biogas composition. 5. The CHP block converts biogas into energy with a calorific value of 10.5 kJ/kg 6. The Separation block determines thick (solid) and thin (liquid) fractions.

**Figure 3**

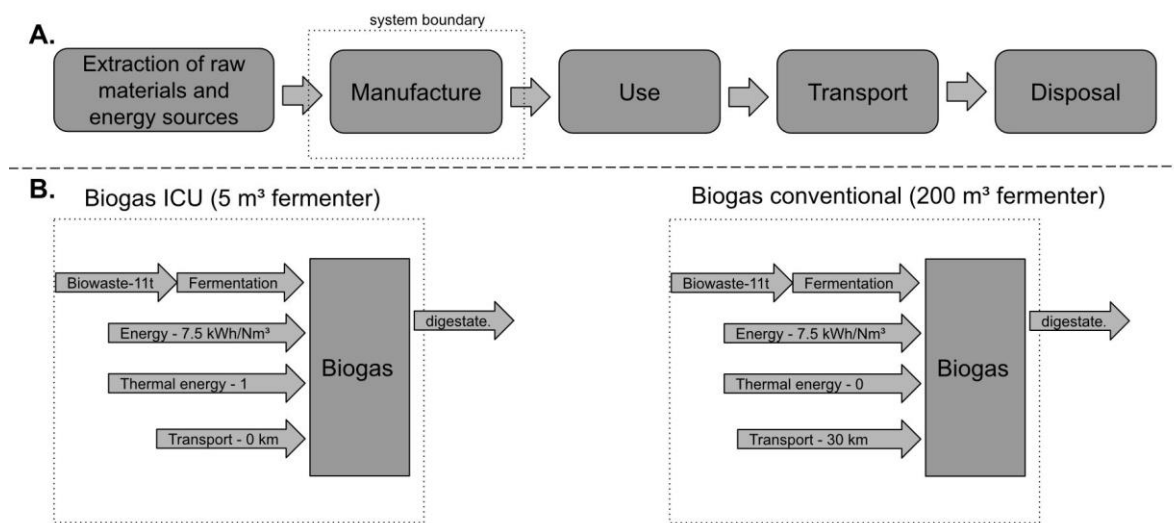

**System boundaries of the Life Cycle Assessment study.** A: System environments of the product life-cycles based on DIN 15804 in four steps and system boundary (functional unit 1 m<sup>3</sup> biogas). B: System boundary for the ICU concept in comparison to a building with transport of biowaste to a conventional biogas plant. (Energy: <https://biogas.fnr.de/daten-und-fakten/faustzahlen>).

**Figure 4**

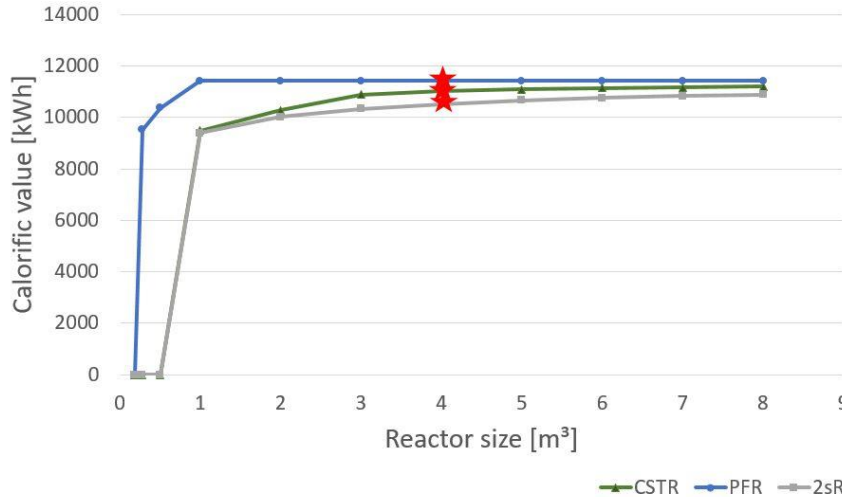

**Evaluation of reactor scenarios with biowaste fermenters.** Energy content of the biogas produced annually (without losses). Only biowaste input. For PFR reactor the sum of all 5 fermenters and for 2sR is hydrolyse + main fermenter are considered. Star shows the chosen reactor size.



**Figure 5**

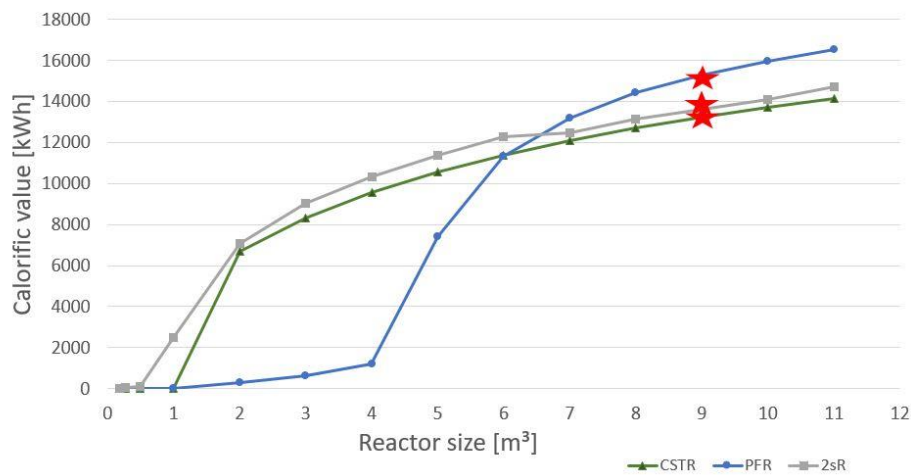

**Evaluation of reactor scenarios with additional blackwater fermenter.** Energy content of the biogas produced annually (without losses). Blackwater input. For PFR reactor the sum of all 5 fermenters and for 2sR is hydrolyse + main fermenter are considered. Star shows the chosen reactor size.

**Figure 6**

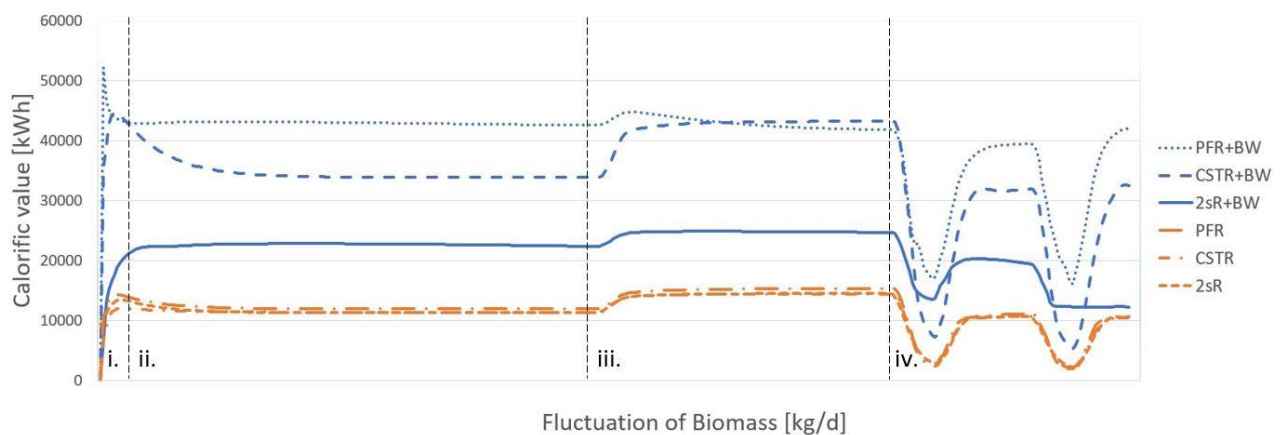

**Dynamic behavior of the ICU model.** Feed fluctuations: Energy production from biowaste (green) and additional black water (BW) (brown) for 2sR, CSTR and PFR fermenters. i: Initiation phase of the model. ii. Feeding rate of 33.6 kg/d iii. Feeding rate of 41.1 kg/d iv. Feeding rate of 30.7 kg/d for five days a week.

**Figure 7**

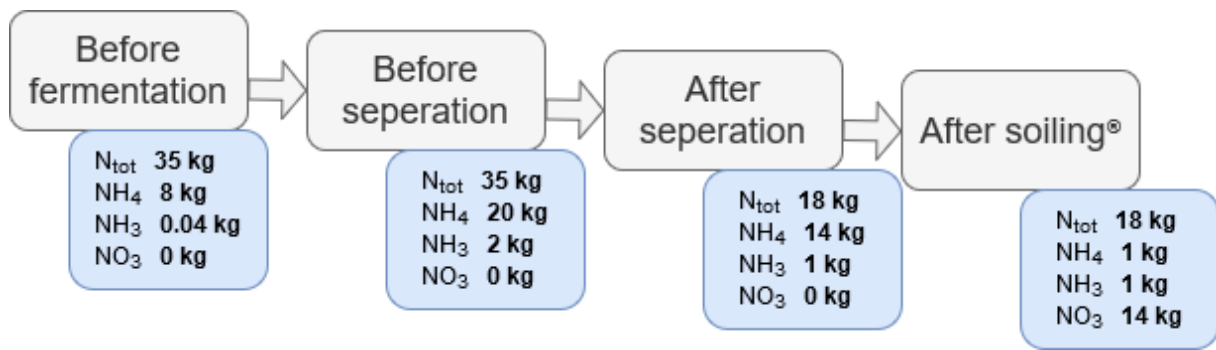

**N flow according to the Simba model.**  $N_{tot}$  = total nitrogen,  $NH_4$  = ammonium,  $NH_3$  = ammonia,  $NO_3$  = nitrate. Quantities relate to one year.

**Figure 8**

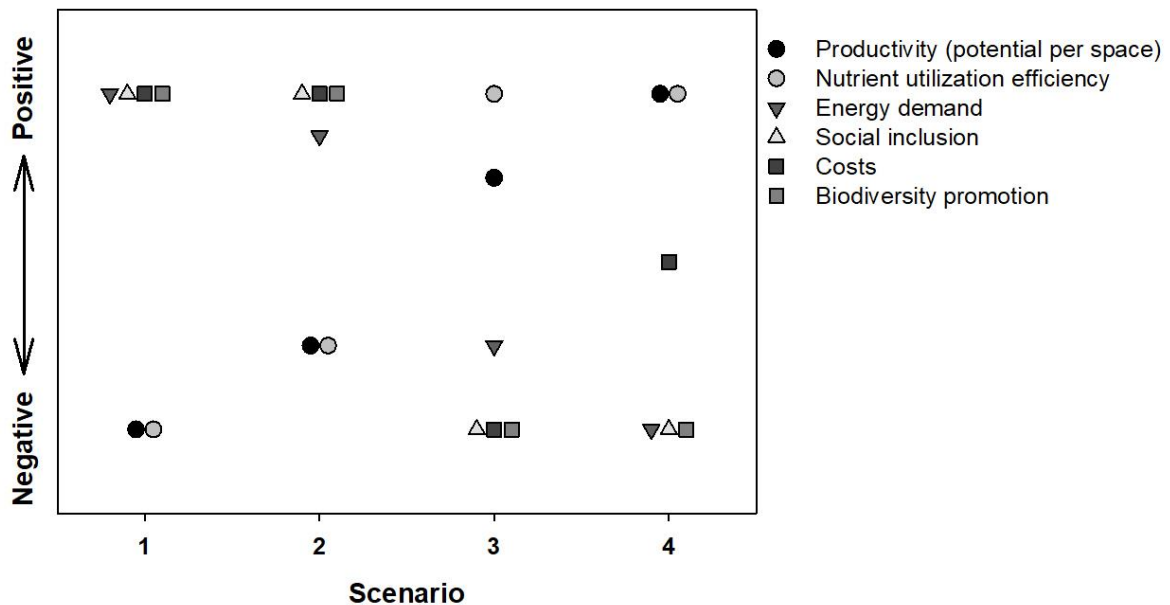

**Relative assessment of the cultivation scenarios.** Scenario 1: roof-top raised-bed, community residents; Scenario 2: roof-top vertical hydroponic system, community residents; Scenario 3: roof-top greenhouse, professional management; Scenario 4: basement vertical farm, professional management.

**Figure 9**

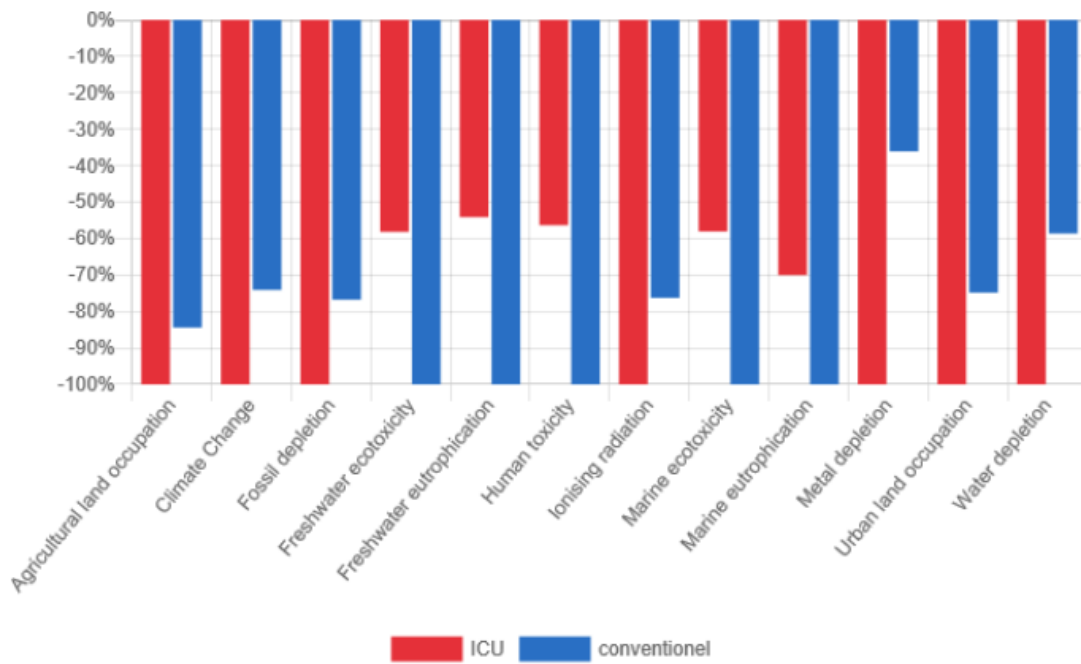

**LCA comparison between ICU-concept and conventional building.** Diagram shows the impact indicators for ICU and conventional building in %.
